# Supplementary material for: An air-stable, Zn2+-based catalyst for hydrosilylation of alkenes and alkynes
Source: Royal Society of Chemistry journal article supplement (doi:10.1039/d1ob00782c), 2021-01-01
Supplement: d1ob00782c1.pdf [file d1ob00782c1.pdf]

## Supporting Information for:

### Air-Stable, Zn<sup>+2</sup> - Based Catalyst for Hydrosilylation of Alkenes and Alkynes

Kristina Groutchik, Kuldeep Jaiswal and Roman Dobrovetsky\*

#### Contents:

|                                             |         |
|---------------------------------------------|---------|
| General Considerations.....                 | S2      |
| Syntheses and Spectroscopic Data.....       | S3-S16  |
| Reactivity test and Spectroscopic Data..... | S17-S39 |
| DFT Computations.....                       | S40-S51 |

## **General Considerations**

All experiments were carried out under an anhydrous N<sub>2</sub> atmosphere using standard Schlenk and glovebox techniques. All glassware was oven dried and cooled under vacuum before use. Commercial reagents were purchased from Sigma Aldrich, Strem or Apollo Scientific and used without further purification unless indicated otherwise. Dichloromethane (DCM), toluene and hexane were dried using Vacuum Atmospheres solvent purification system. 1,2-Dichlorobenzene (DCB), 1,2-difluorobenzene (DFB) and acetonitrile, were dried over CaH<sub>2</sub> and distilled from it. Potassium tetrakis(pentafluorophenyl)borate was prepared according to previously reported procedure.<sup>[1, 2]</sup> NMR spectra were recorded at room temperature in CDCl<sub>3</sub> solution or non-deuterated solvent, using DMSO capillary in J. Young NMR tubes, using a Bruker AvanceIII - 400 MHz spectrometer. Data for <sup>1</sup>H NMR are reported as follows: chemical shift (δ ppm), multiplicity (s = singlet, d = doublet, t = triplet, q = quartet, quin = quintet, m = multiplet, b = broad), coupling constant (Hz), integration.

## Preparation of TmPPh

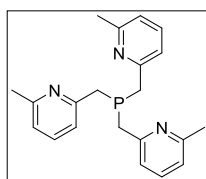

An n-BuLi solution (20 mL, 31.9 mmol, 1.6 M in hexane) was added dropwise to a degassed solution of lutidine (2.8 mL, 24.4 mmol) in 100 mL of THF at  $-78\text{ }^{\circ}\text{C}$  under  $\text{N}_2$  and magnetic stirring. After one hour stirring at  $-78\text{ }^{\circ}\text{C}$ , degassed chlorotrimethylsilane (3.1 mL, 24.4 mmol) was added dropwise to the solution and the system was allowed to reach room temperature overnight. The precipitated LiCl was removed by filtration and to the remained solution of lutidinetrimethylsilane in tetrahydrofuran (50 mL) at  $-78\text{ }^{\circ}\text{C}$ , phosphorus trichloride (0.69 mL, 8.1 mmol) was slowly added and the system was allowed to warm to room temperature and stirred overnight. The solvent was then removed and orange residue was obtained. This residue was triturated with boiling hexane and after cooling, **TmPPh** precipitated as white powder (1.2 g, 3.4 mmol, 42%). **TmPPh** was crystallized from hexane and its molecular structure was determined by X-ray crystallography.

$^1\text{H NMR}$  ( $\text{CDCl}_3$ , 400.13 MHz):  $\delta$  7.41 (t,  $J = 7.7\text{ Hz}$ , 1H),  $\delta$  7.06 (d,  $J = 7.6\text{ Hz}$ , 1H),  $\delta$  6.90 (d,  $J = 7.6\text{ Hz}$ , 1H),  $\delta$  3.04 (s, 2H),  $\delta$  2.49 (s, 3H);  $^{31}\text{P NMR}$  ( $\text{CDCl}_3$ , 161.99 MHz):  $\delta$  -13.8;  $^{13}\text{C NMR}$  ( $\text{CDCl}_3$ , 100.61 MHz):  $\delta$  = 159.3 (d,  $J=4.5\text{ Hz}$ ), 159.1, 137.7, 122.2 (d,  $J=4.2$ ), 121.6, 37.3 (d,  $J=21.3$ ), 26.0; HRMS (EI):  $m/z$  calcd. for  $[\text{C}_{21}\text{H}_{25}\text{N}_3\text{P}]$ : 350.1786 (M+H $^+$ ); found: 350.1791

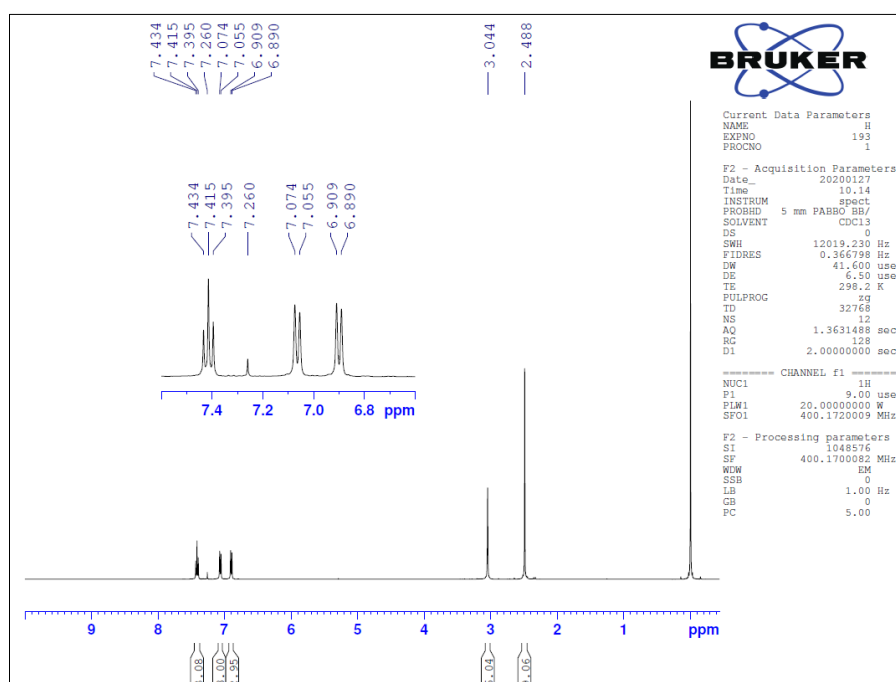

**Figure S1.**  $^1\text{H NMR}$  spectrum of **TmPPh** ( $\text{CDCl}_3$ , 400.13 MHz).

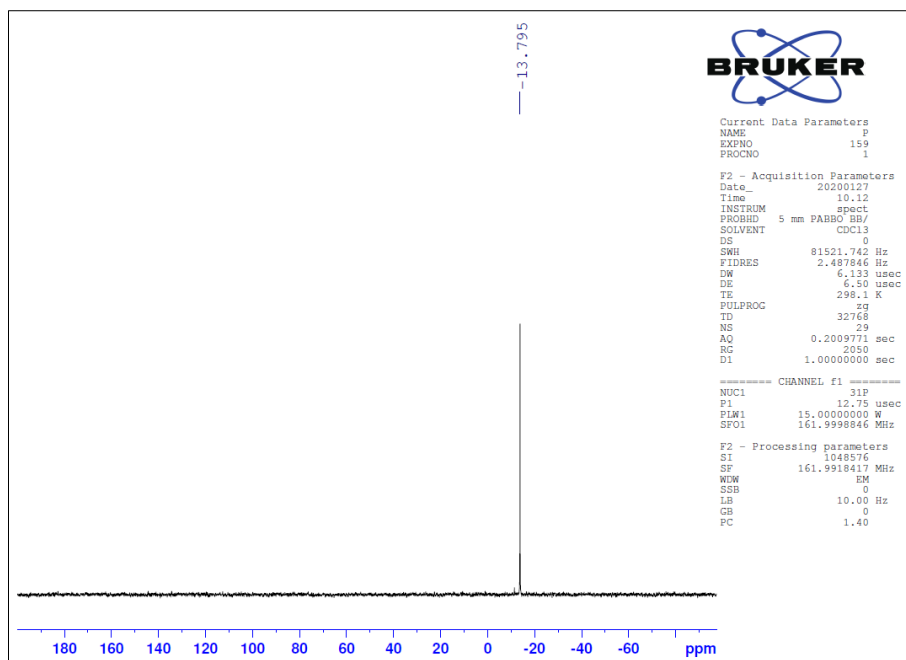

Figure S2.  $^{31}\text{P}$  NMR spectrum of **TmPPh** ( $\text{CDCl}_3$ , 161.99 MHz).

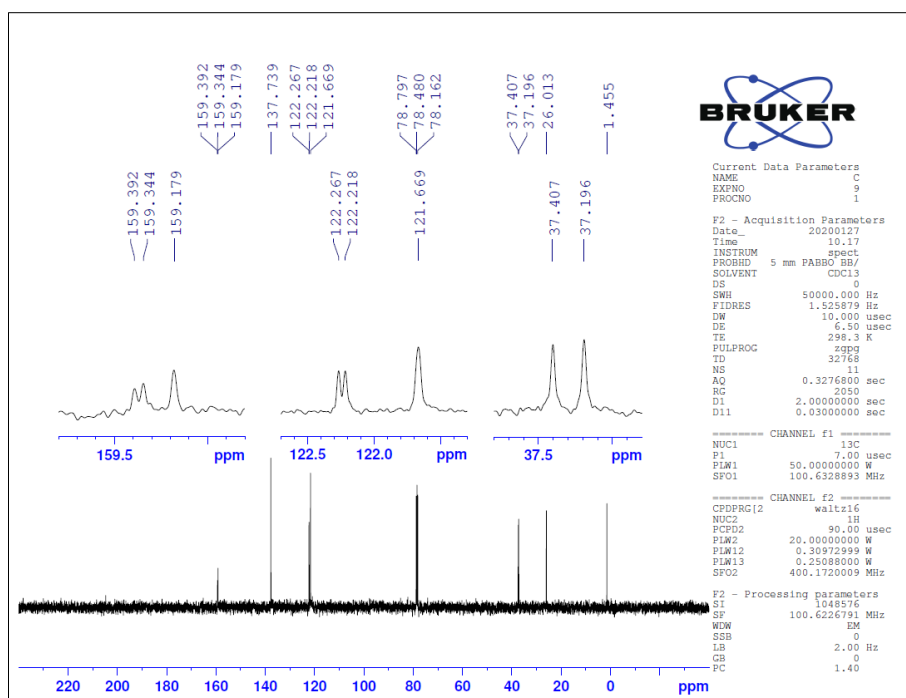

Figure S3.  $^{13}\text{C}$  NMR spectrum of **TmPPh** ( $\text{CDCl}_3$ , 100.61 MHz).

## Preparation of TmPPh-oxide

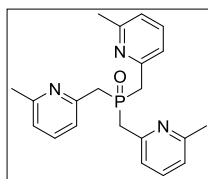

NMR tube containing the  $\text{CDCl}_3$  solution of **TmPPh** was kept open to air overnight, resulting in a quantitative transformation to **TmPPh-oxide**.

$^1\text{H}$  NMR ( $\text{CDCl}_3$ , 400.13 MHz):  $\delta$  7.50 (t,  $J = 7.4$  Hz, 1H),  $\delta$  7.26 (d, 1H),  $\delta$  7.00 (d,  $J = 7.6$  Hz, 1H),  $\delta$  3.44 (d,  $J = 14.8$  Hz, 2H),  $\delta$  2.52 (s, 3H);  $^{31}\text{P}$  NMR ( $\text{CDCl}_3$ , 161.99 MHz):  $\delta$  -13.8;  $^{13}\text{C}$  NMR ( $\text{CDCl}_3$ , 100.61 MHz):  $\delta = 158.0, 152.4, 136.8, 122.03$  (d,  $J = 4.2$ ), 121.2, 38.3 (d,  $J = 60.1$ ), 24.3; HRMS (EI):  $m/z$  cacl. for  $[\text{C}_{21}\text{H}_{25}\text{N}_3\text{PO}]$ : 366.1735 ( $\text{M} + \text{H}^+$ ); found: 366.1736

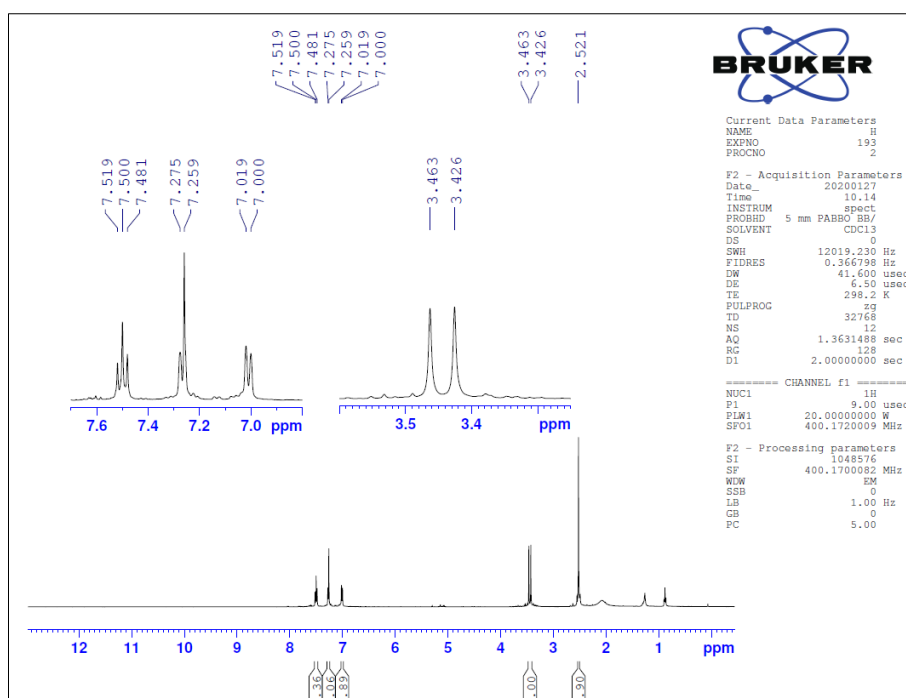

**Figure S4.**  $^1\text{H}$  NMR spectrum of **TmPPh-oxide** ( $\text{CDCl}_3$ , 400.13 MHz).

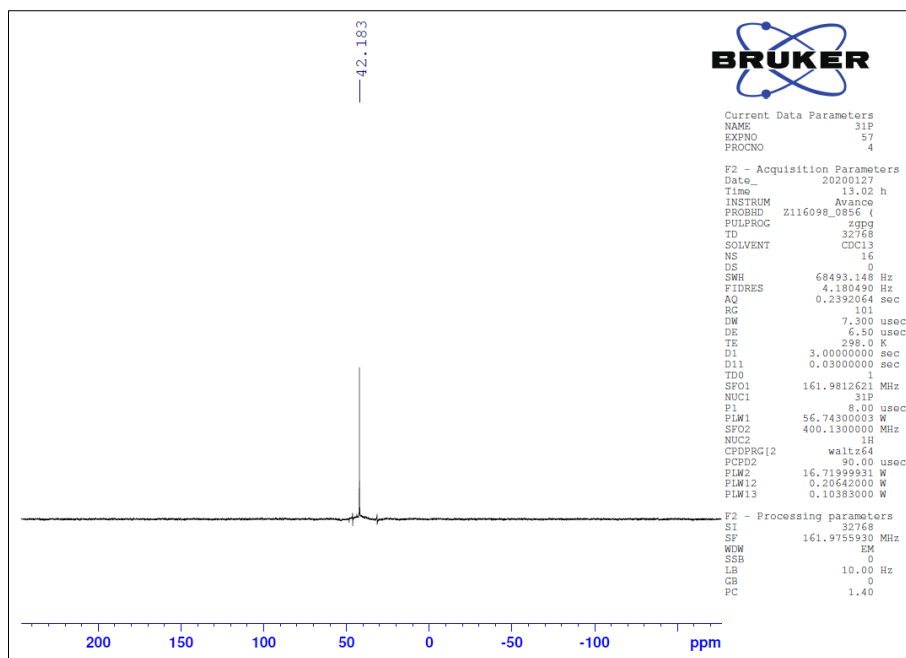

Figure S5.  $^{31}\text{P}$  NMR spectrum of TmPPh-oxide ( $\text{CDCl}_3$ , 161.99 MHz).

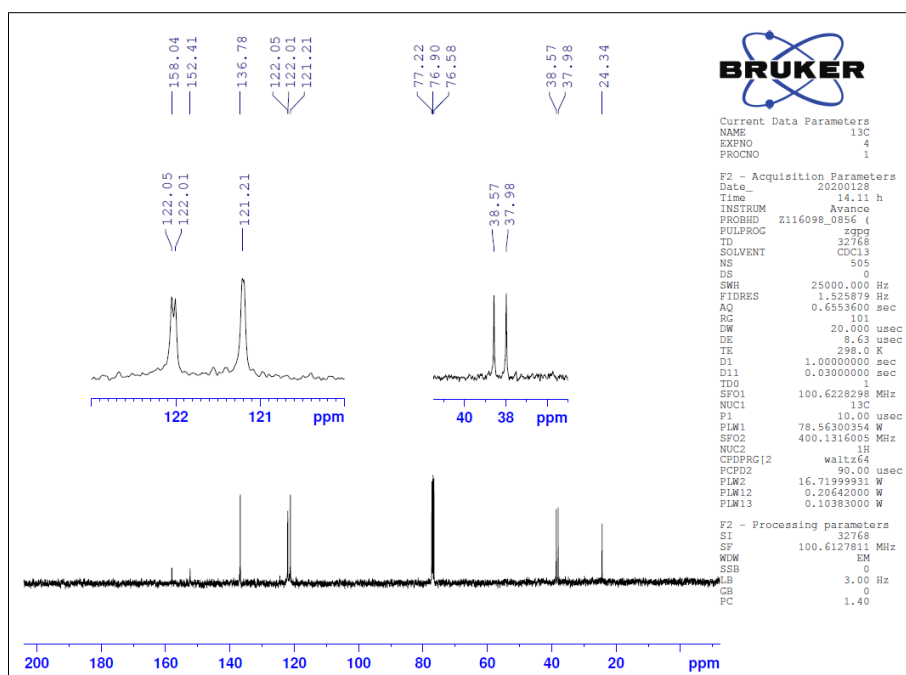

Figure S6.  $^{13}\text{C}$  NMR spectrum of TmPPh-oxide ( $\text{CDCl}_3$ , 100.61 MHz).

## Preparation of TmPPh<sub>2</sub>·ZnCl<sub>2</sub> (**2**)

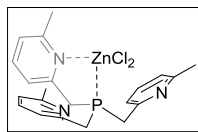

Zinc chloride (0.36 g, 1.2 mmol) was added to solution of **TmPPh** (0.43 g, 1.2 mmol) in dry tetrahydrofuran (15 mL) under N<sub>2</sub> and magnetic stirring. After 2 h of stirring, tetrahydrofuran was removed under reduced pressure, and 15 mL of dichloromethane were added. **2** was crystallized from a concentrated tetrahydrofuran in 95 % yield, and its molecular structure was determined by X-ray crystallography.

<sup>1</sup>H NMR (CDCl<sub>3</sub>, 400.13 MHz): δ 7.57 (t, J = 7.64 Hz, 1H), δ 7.16 (d, J = 7.70 Hz, 1H), δ 7.06 (d, J = 7.58 Hz, 1H), δ 3.50 (d, J = 7.47 Hz, 2H), δ 2.65 (s, 3H); <sup>31</sup>P NMR (CDCl<sub>3</sub>, 161.99 MHz): δ -23.8; <sup>13</sup>C NMR (CDCl<sub>3</sub>, 100.61 MHz): δ= 158.9, 153.4, 138.2, 122.7, 122.1, 30.4 (d, J=13.7), 24.5;

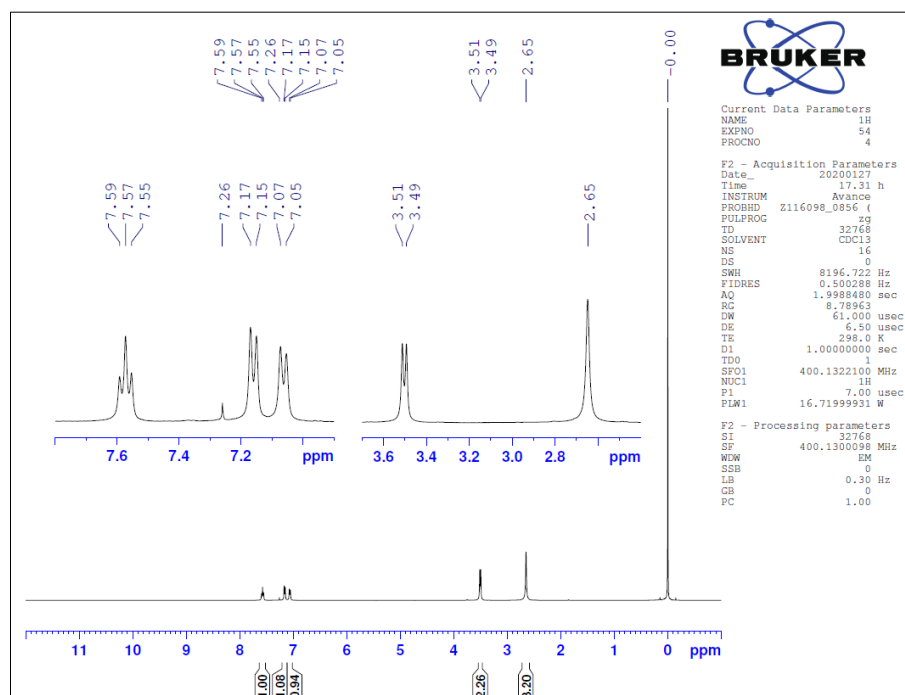

**Figure S7.** <sup>1</sup>H NMR spectrum of TmPPh<sub>2</sub>·ZnCl<sub>2</sub> (**2**) (CDCl<sub>3</sub>, 400.13 MHz).

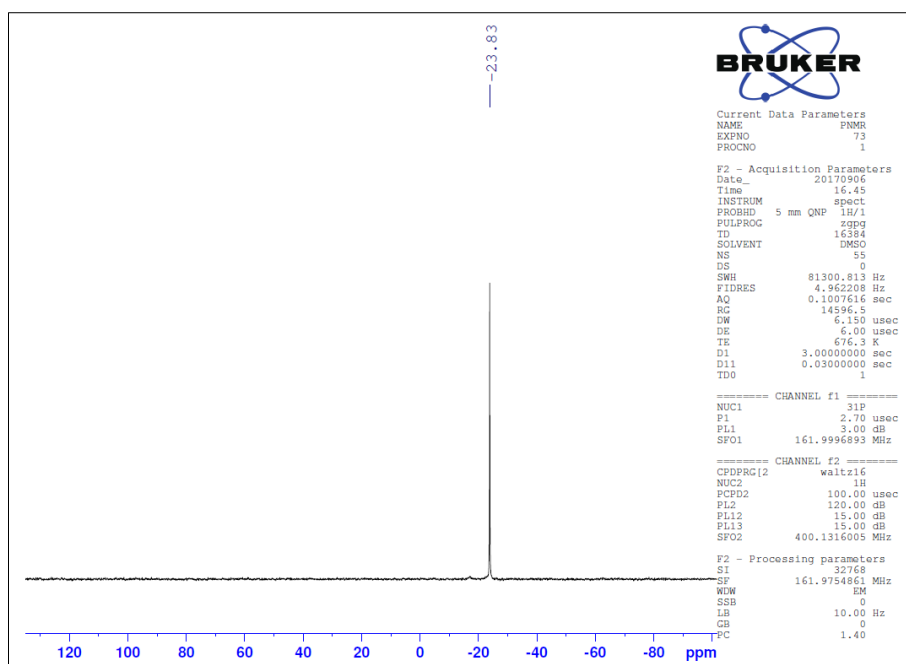

Figure S8.  $^{31}\text{P}$  NMR spectrum of  $\text{TmPPh}\cdot\text{ZnCl}_2$  (**2**) ( $\text{CDCl}_3$ , 161.99 MHz).

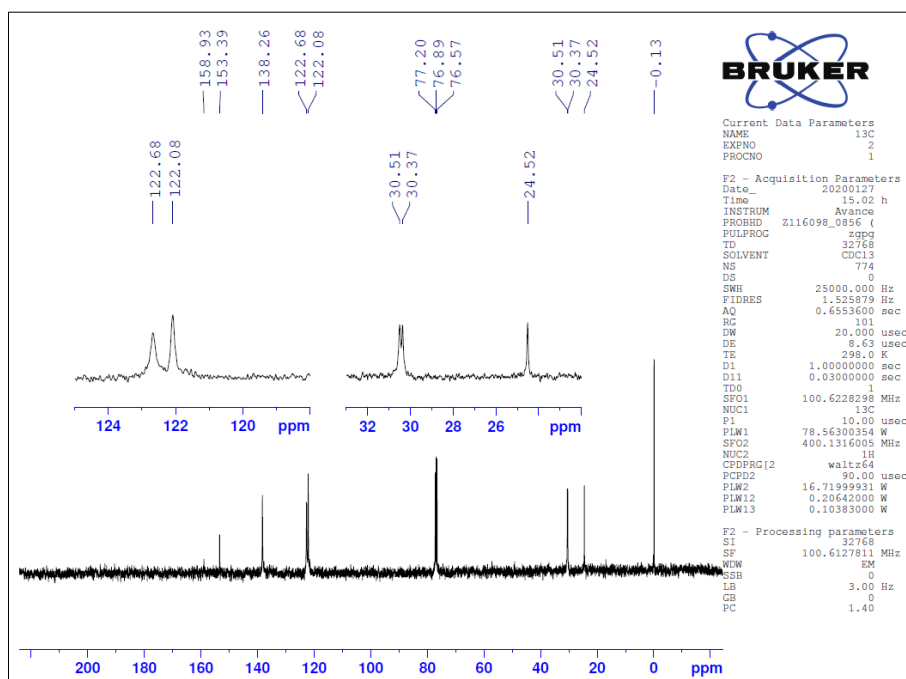

Figure S9.  $^{13}\text{C}$  NMR spectrum of  $\text{TmPPh}\cdot\text{ZnCl}_2$  (**2**) ( $\text{CDCl}_3$ , 100.61 MHz).



### Preparation of [TmPPh·ZnCl][B(C<sub>6</sub>F<sub>5</sub>)<sub>4</sub>] (3)

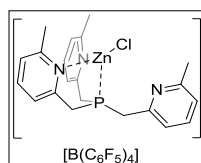

Potassium tetrakis(pentafluorophenyl)borate (0.86 g, 1.2 mmol) was added to solution of **2** (0.79 g, 1.2 mmol) in dry dichloromethane under N<sub>2</sub> and magnetic stirring. The solution was left to stir overnight.

The precipitated KCl was removed by filtration and the solvent was evaporated yielding **3** in 96% yields.

<sup>1</sup>H NMR (CDCl<sub>3</sub>, 400.13 MHz): δ 8.00 (t, J = 7.6 Hz, 1H), δ 7.49 (d, J = 7.9 Hz, 1H), δ 7.46 (d, J = 7.9 Hz, 1H), δ 3.89 (d, J = 9.2 Hz, 2H), δ 2.93 (s, 3H); <sup>31</sup>P NMR (CDCl<sub>3</sub>, 161.99 MHz): δ -42.6; <sup>13</sup>C NMR (CDCl<sub>3</sub>, 100.61 MHz): δ = 158.8, 153.7, 149.2, 146.7, 140.1, 137.2, 134.8, 124.2, 123.1 (d, J=6.4 Hz), 30.7 (d, J=24.6 Hz), 25.5; <sup>19</sup>F NMR (CDCl<sub>3</sub>, 376.53 MHz): δ 133.6, 164.1 (t, J=15.1 Hz), 168.0; <sup>11</sup>B NMR (CDCl<sub>3</sub>, 128.37 MHz): δ -16.7; HRMS (EI): m/z cacl. for [C<sub>21</sub>H<sub>24</sub>N<sub>3</sub>PZnCl]: 448.0688 (M); found: 448.0683

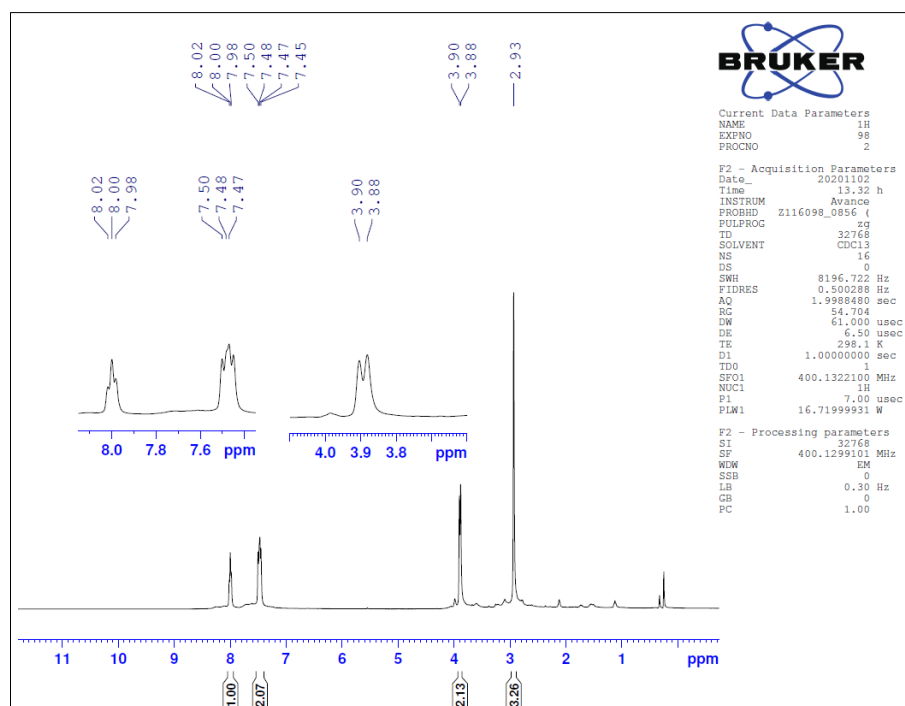

**Figure S10.** <sup>1</sup>H NMR spectrum of [TmPPh·ZnCl][B(C<sub>6</sub>F<sub>5</sub>)<sub>4</sub>] (**3**) (CDCl<sub>3</sub>, 400.13 MHz).

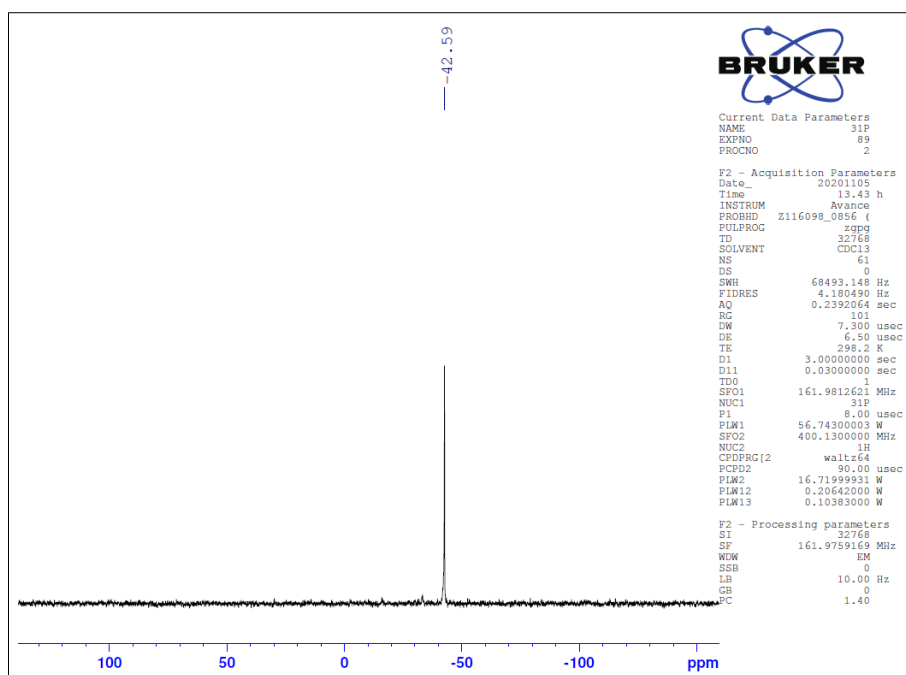

**Figure S11.**  $^{31}\text{P}$  NMR spectrum of  $[\text{TmPPh}\cdot\text{ZnCl}][\text{B}(\text{C}_6\text{F}_5)_4]$  (**3**) ( $\text{CDCl}_3$ , 161.99 MHz).

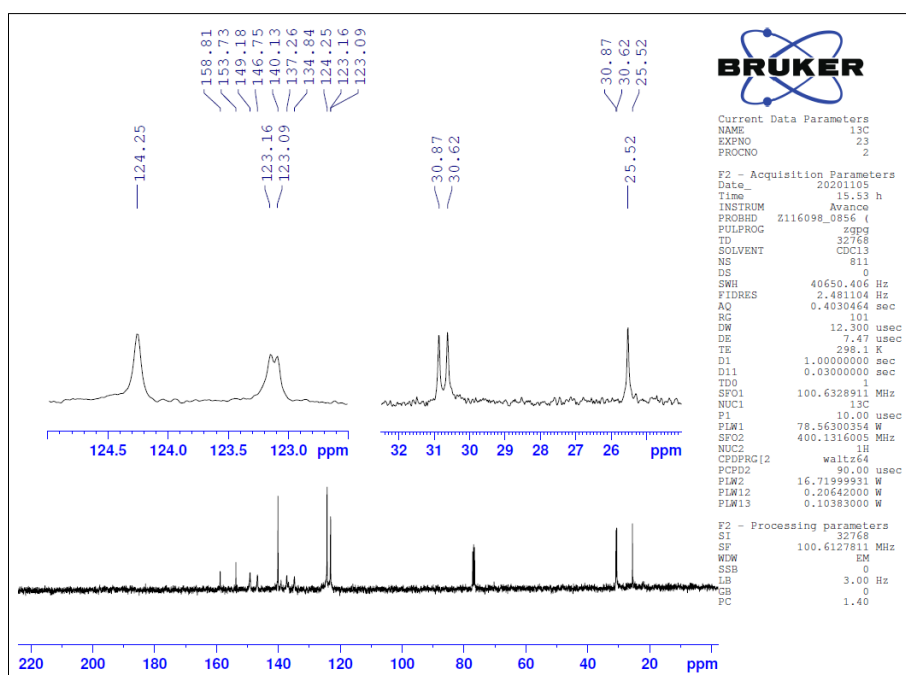

**Figure S12.**  $^{13}\text{C}$  NMR spectrum of  $[\text{TmPPh}\cdot\text{ZnCl}][\text{B}(\text{C}_6\text{F}_5)_4]$  (**3**) ( $\text{CDCl}_3$ , 100.61 MHz).

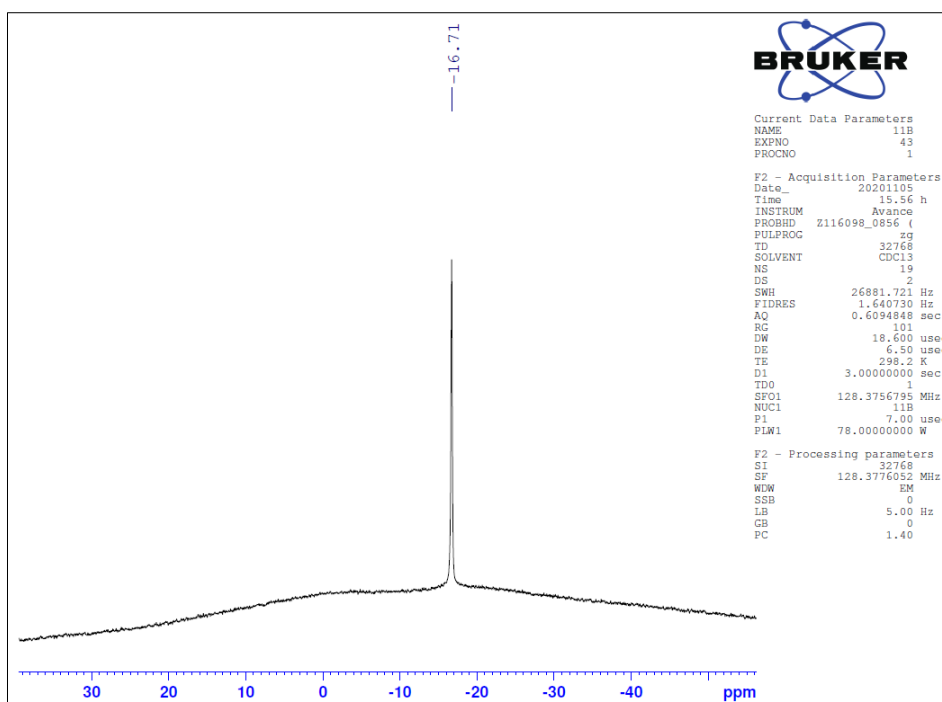

**Figure S13.**  $^{11}\text{B}$  NMR spectrum of  $[\text{TmPPh}\cdot\text{ZnCl}][\text{B}(\text{C}_6\text{F}_5)_4]$  (**3**) ( $\text{CDCl}_3$ , 128.37 MHz).

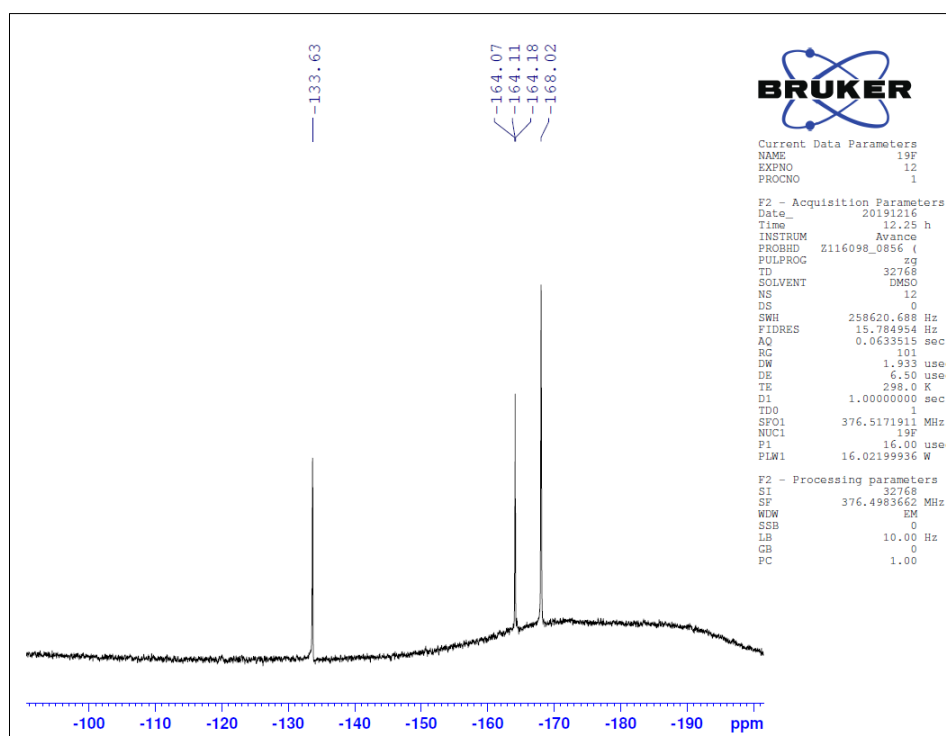

**Figure S14.**  $^{19}\text{F}$  NMR spectrum of  $[\text{TmPPh}\cdot\text{ZnCl}][\text{B}(\text{C}_6\text{F}_5)_4]$  (**3**) ( $\text{CDCl}_3$ , 376.53 MHz).

## Preparation of [TmPPh<sub>3</sub>Zn][B(C<sub>6</sub>F<sub>5</sub>)<sub>4</sub>]<sub>2</sub> (**1**)

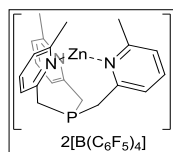

Potassium tetrakis(pentafluorophenyl)borate (0.86 g, 1.2 mmol) was added to solution of **3** (0.79 g, 1.2 mmol) in dry 1,2-dichlorobenzene.

The reaction mixture was left to stir overnight at 120 °C. The precipitated KCl was removed by filtration and the solvent was evaporated to obtain **1** in 95% yield.

<sup>1</sup>H NMR (DMSO-d<sub>6</sub> capillary in dichloromethane, 400.13 MHz): δ 8.56 (t, J = 8.0 Hz, 1H), δ 7.99 (d, J = 7.8 Hz, 1H), δ 7.75 (d, J = 7.8 Hz, 1H), δ 3.44 (d, J = 5.1 Hz, 2H), δ 3.20 (s, 3H); <sup>31</sup>P NMR (DMSO-d<sub>6</sub> capillary in DCM, 161.99 MHz): δ -12.6; <sup>13</sup>C NMR (DMSO-d<sub>6</sub> capillary in DCM, 100.61 MHz): δ= 155.2, 150.7, 148.6, 146.1, 143.9, 136.7, 134.3, 124.7, 123.5, 28.8 (d, J=24.7 Hz), 20.0; <sup>19</sup>F NMR (DMSO-d<sub>6</sub> capillary in DCM, 376.53 MHz): δ 134.2, 164.1 (t, J=18.5 Hz), 168.2; <sup>11</sup>B NMR (DMSO-d<sub>6</sub> capillary in DCM, 128.37 MHz): δ -16.8; HRMS (EI): m/z cacl. for [C<sub>21</sub>H<sub>23</sub>N<sub>3</sub>PZn]: 412.0921 (M-H<sup>+</sup>); found: 412.0912

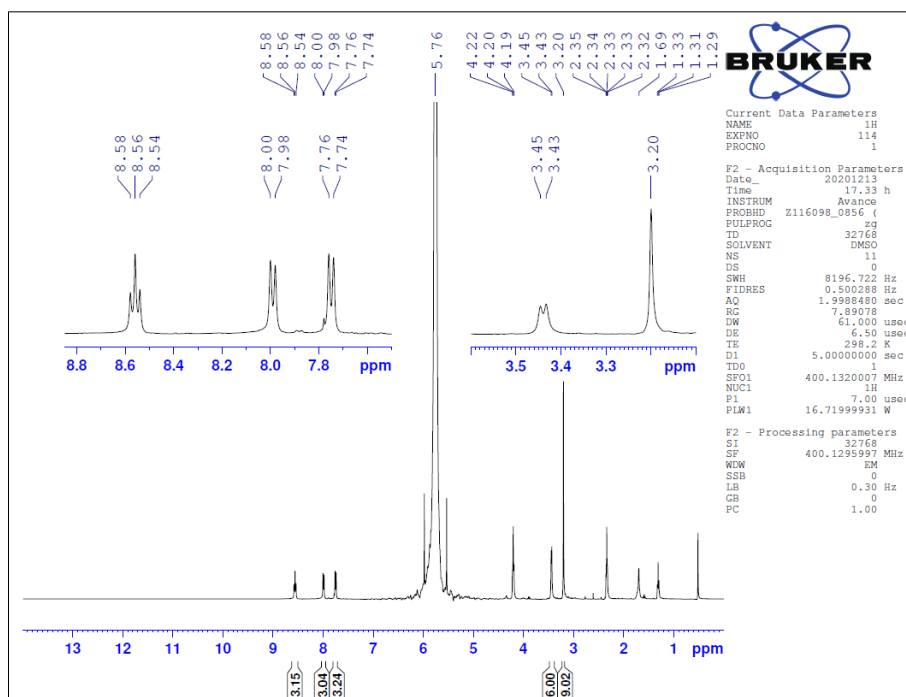

**Figure S6.** <sup>1</sup>H NMR spectrum of [TmPPh<sub>3</sub>Zn][B(C<sub>6</sub>F<sub>5</sub>)<sub>4</sub>]<sub>2</sub> (**1**) (CDCl<sub>3</sub>, 400.13 MHz).

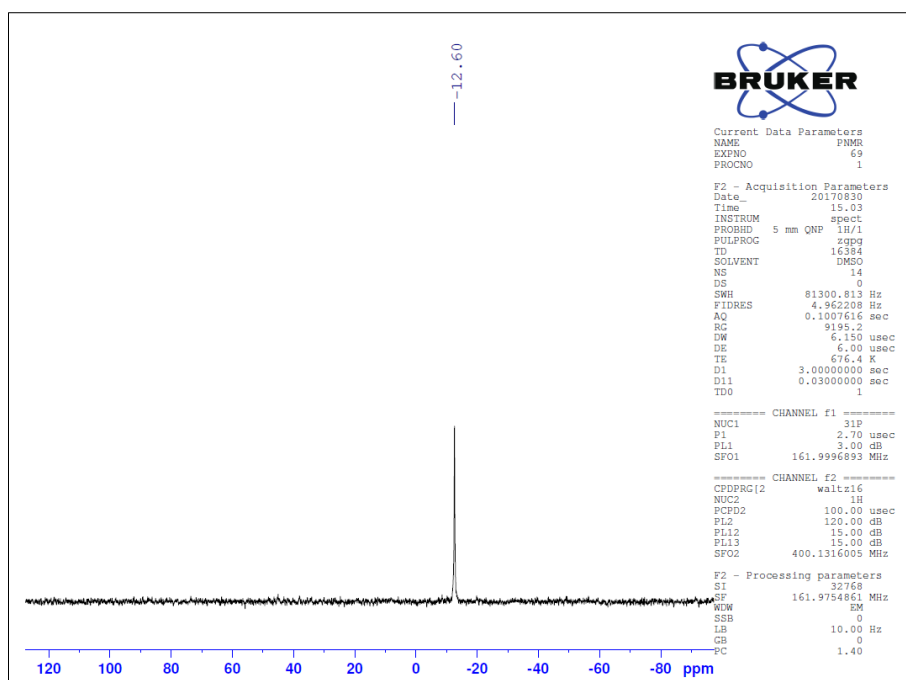

Figure S7.  $^{31}\text{P}$  NMR spectrum of  $[\text{TmPPh}\cdot\text{Zn}][\text{B}(\text{C}_6\text{F}_5)_4]_2$  (**1**) ( $\text{CDCl}_3$ , 161.99 MHz).

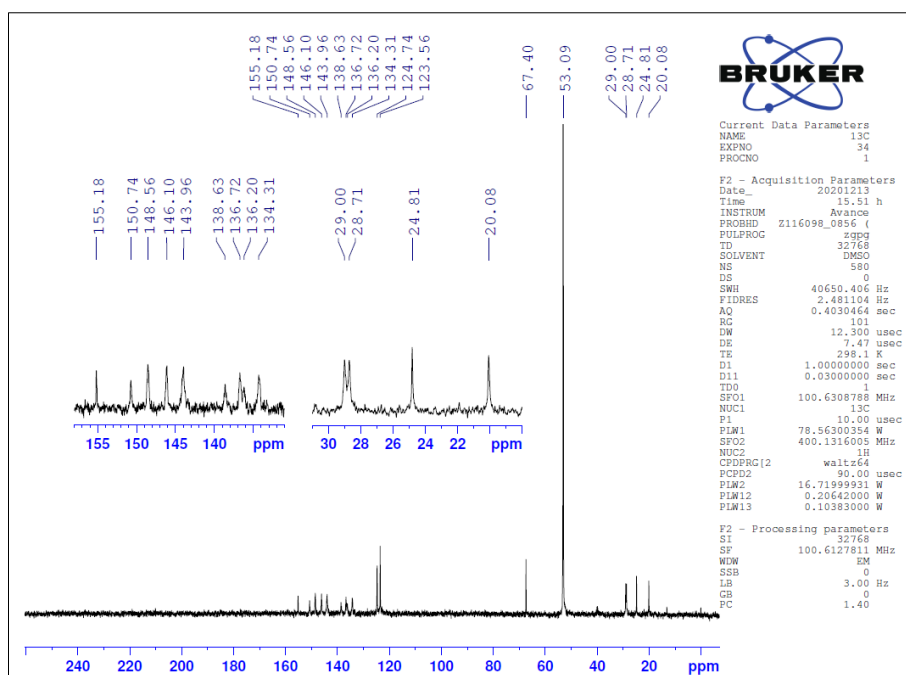

Figure S8.  $^{13}\text{C}$  NMR spectrum of  $[\text{TmPPh}\cdot\text{Zn}][\text{B}(\text{C}_6\text{F}_5)_4]_2$  (**1**) ( $\text{CDCl}_3$ , 100.61 MHz).

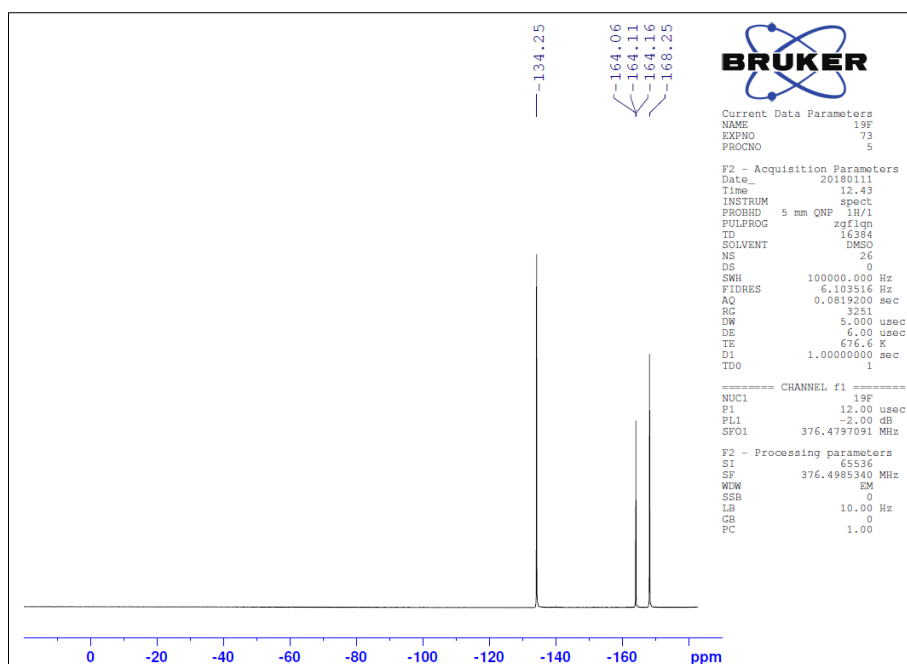

**Figure S9.**  $^{19}\text{F}$  NMR spectrum of  $[\text{TmPPh}\cdot\text{Zn}][\text{B}(\text{C}_6\text{F}_5)_4]_2$  (**1**) ( $\text{CDCl}_3$ , 376.53 MHz).

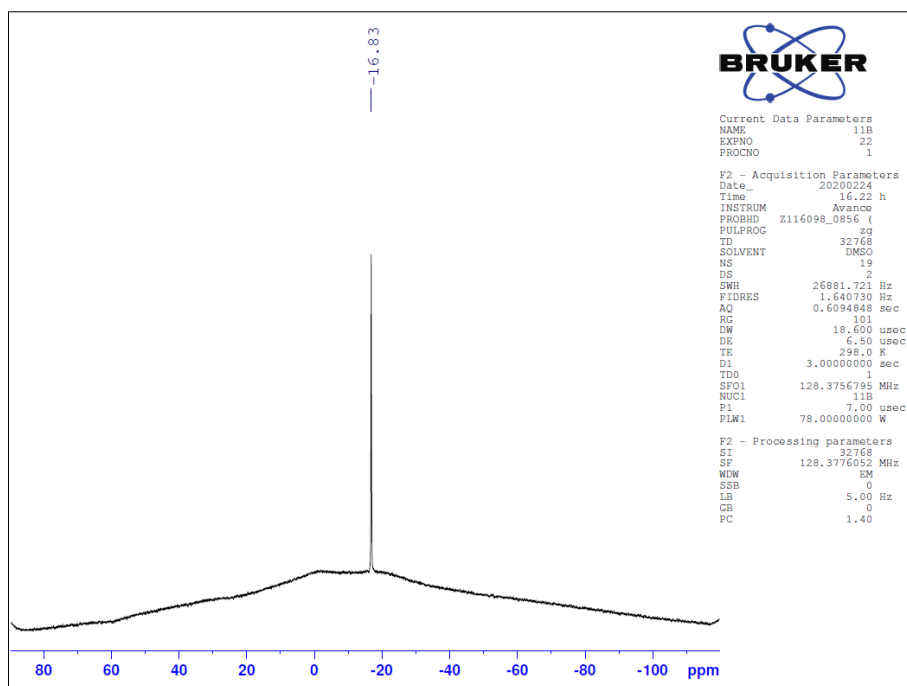

**Figure S10.**  $^{11}\text{B}$  NMR spectrum of  $[\text{TmPPh}\cdot\text{Zn}][\text{B}(\text{C}_6\text{F}_5)_4]_2$  (**1**) ( $\text{CDCl}_3$ , 128.37 MHz).

**Reaction of [TmPPh<sub>3</sub>Zn][B(C<sub>6</sub>F<sub>5</sub>)<sub>4</sub>]<sub>2</sub> (**1**) with [N(n-Bu)<sub>4</sub>]<sub>2</sub>[B<sub>12</sub>I<sub>12</sub>]**

**1** (0.86 g, 1.2 mmol) was added to an acetonitrile solution of [N(n-Bu)<sub>4</sub>]<sub>2</sub>[B<sub>12</sub>I<sub>12</sub>] (1:1) under N<sub>2</sub>. Immediately after the addition, crystalline material precipitated out of the solution and could not be redissolved in common organic solvents. A close analysis of this precipitate revealed two type of crystals. The molecular structures of both types of crystals were determined by X-ray crystallography. The first type of crystals were of [2TmPPh<sub>3</sub>Zn][B<sub>12</sub>I<sub>12</sub>] (**4**) (Figure S20, a). The second type of crystals were of [6CH<sub>3</sub>CN·Zn][B<sub>12</sub>I<sub>12</sub>] (**5**) (Figure S20, b).

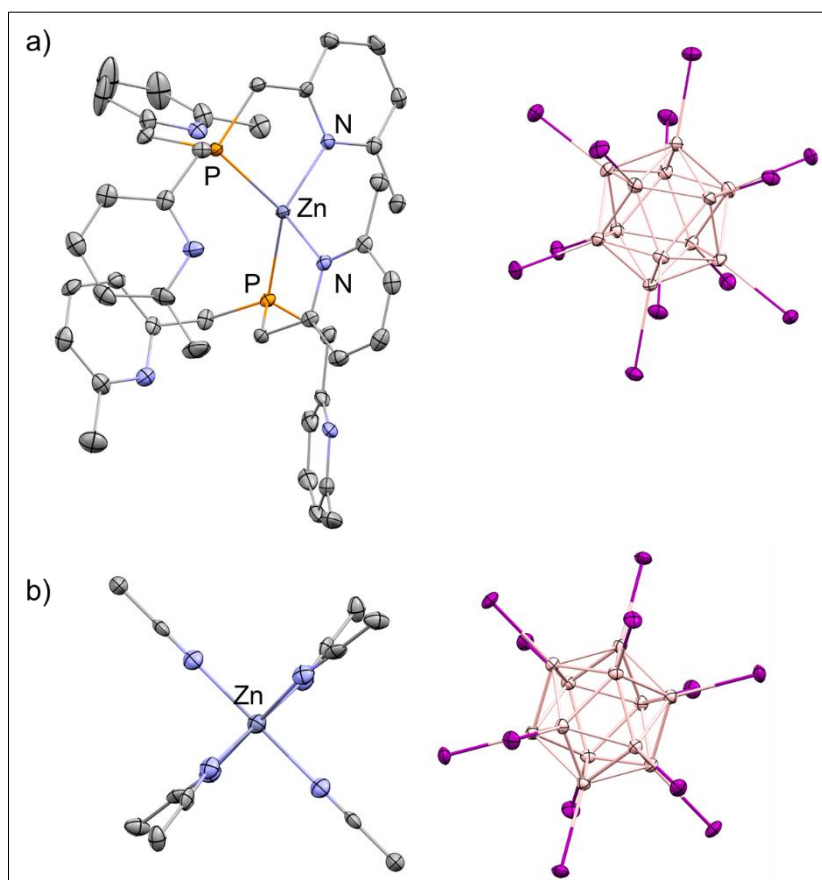

**Figure S20.** a) POV-ray depiction of **4** (a) and **5** (b). Thermal ellipsoids at the 50% probability level, hydrogens were omitted for clarity.

**Table S1.** Hydrosilylation of alkenes and alkynes catalyzed by **1**.

| entry | Substrate                                                                           | Hydrosilane                      | Time [h]<br>/ T [°C] | Product                                                                             | NMR Conversion [%] | Isolated Yield [%] |
|-------|-------------------------------------------------------------------------------------|----------------------------------|----------------------|-------------------------------------------------------------------------------------|--------------------|--------------------|
| 1     |    | Et <sub>3</sub> SiH              | 3 / 120              |    | 99%                | 90%                |
| 2     |    | PhSiH <sub>3</sub>               | 3 / 100              | Mixture of a single hydrosilylation products due to isomerization                   | 99%                | -                  |
| 3     |    | Ph <sub>2</sub> SiH <sub>2</sub> | 3 / 100              | Mixture of a single hydrosilylation products due to isomerization                   | 99%                | -                  |
| 4     |    | Me <sub>2</sub> ClSiH            | 3 / 100              |    | 99%                | -                  |
| 5     |    | Ph <sub>2</sub> ClSiH (Neat)     | 3 / 100              | Mixture of hydrosilylation products                                                 | 99%                | -                  |
| 6     |    | Et <sub>3</sub> SiH              | 3 / 120              |    | 99%                | 95%                |
| 7     |    | Et <sub>3</sub> SiH              | 3 / 120              |    | 99%                | 93%                |
| 8     |    | Ph <sub>2</sub> ClSiH (Neat)     | 3 / 100              | Mixture of hydrosilylation products                                                 | 99%                | -                  |
| 9     |   | Et <sub>3</sub> SiH              | 3 / 120              |   | 99%                | 89%                |
| 10    |  | Et <sub>3</sub> SiH              | 3 / 120              |  | 99%                | 91%                |
| 11    |  | Et <sub>3</sub> SiH              | 3 / 120              |  | 99%                | 83%                |
| 12    |  | Et <sub>3</sub> SiH              | 3 / 120              |  | 99%                | -                  |
| 13    |  | Et <sub>3</sub> SiH              | 3 / 120              |  | 99%                | 90%                |
| 14    |  | Et <sub>3</sub> SiH              | 3 / 80               |  | 99%                | 95%                |
| 15    |  | Et <sub>3</sub> SiH              | 3 / 80               |  | 99%                | 93%                |

### Hydrosilylation of alkenes and alkynes:

To a 1:1 solution of alkene/alkyne and Et<sub>3</sub>SiH in 1,2-difluorobenzene in J-Young tube, **1** (0.5 mol%) was added and the reaction mixture was stirred for the indicated period of time at the required temperature (see Table S1). The conversion was determined by <sup>1</sup>H NMR spectroscopy. The products of hydrosilylation were purified by filtration of the reaction mixture through celite column, followed by evaporation of all the volatiles.



### Hydrosilylation of 1-hexene with Et<sub>3</sub>SiH (Table S1, entry 1):

Reaction was performed in 1,2-difluorobenzene at 120 °C. <sup>1</sup>H NMR (CDCl<sub>3</sub>, 400.13 MHz): δ 1.37 (m, CH<sub>2</sub>, 8H), 1.00 (t, J = 7.9 Hz, SiCH<sub>2</sub>CH<sub>3</sub>, 9H), 0.97 (t, J = 6.8 Hz, CH<sub>3</sub>, 3H), 0.58 (q, J = 7.9 Hz, SiCH<sub>2</sub>CH<sub>3</sub>, 6H), 0.58 (obscured, SiCH<sub>2</sub>, 2H). <sup>13</sup>C NMR (CDCl<sub>3</sub>, 100.61 MHz): 33.51 (CH<sub>2</sub>), 31.48 (CH<sub>2</sub>), 23.69 (CH<sub>2</sub>), 22.53 (CH<sub>2</sub>), 14.03 (CH<sub>3</sub>), 11.19 (SiCH<sub>2</sub>), 7.35 (SiCH<sub>2</sub>CH<sub>3</sub>), 3.20 (SiCH<sub>2</sub>CH<sub>3</sub>). <sup>29</sup>Si NMR (CDCl<sub>3</sub>, 79.5 MHz): δ 6.0 (Et<sub>3</sub>SiR).

### Hydrosilylation of 1-hexene with Et<sub>3</sub>SiH under aerobic conditions:

Et<sub>3</sub>SiH and 1-hexene (1:1) and **1** (0.5 mol%) were dissolved in 1,2-difluorobenzene under aerobic conditions and placed in a J-Young NMR tube. Afterwards, the J-Young NMR tube solution was degassed and left for heating at 120 °C for 3 h. The results were similar in both aerobic and anaerobic conditions.

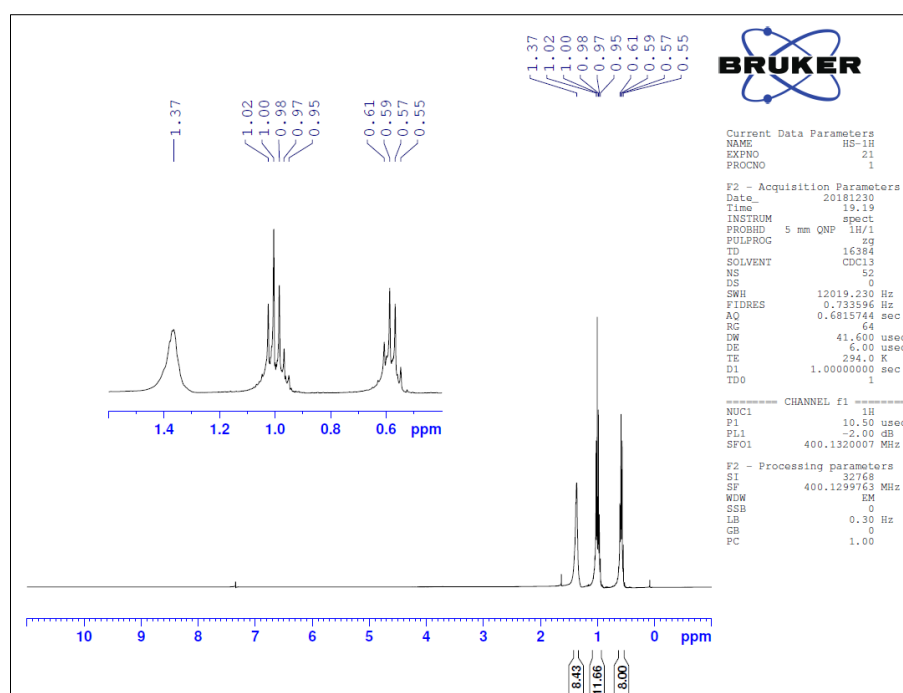

**Figure S21.** <sup>1</sup>H NMR spectrum of 1-hexene hydrosilylation product (Table S1, entry 1) (CDCl<sub>3</sub>, 400.13 MHz).

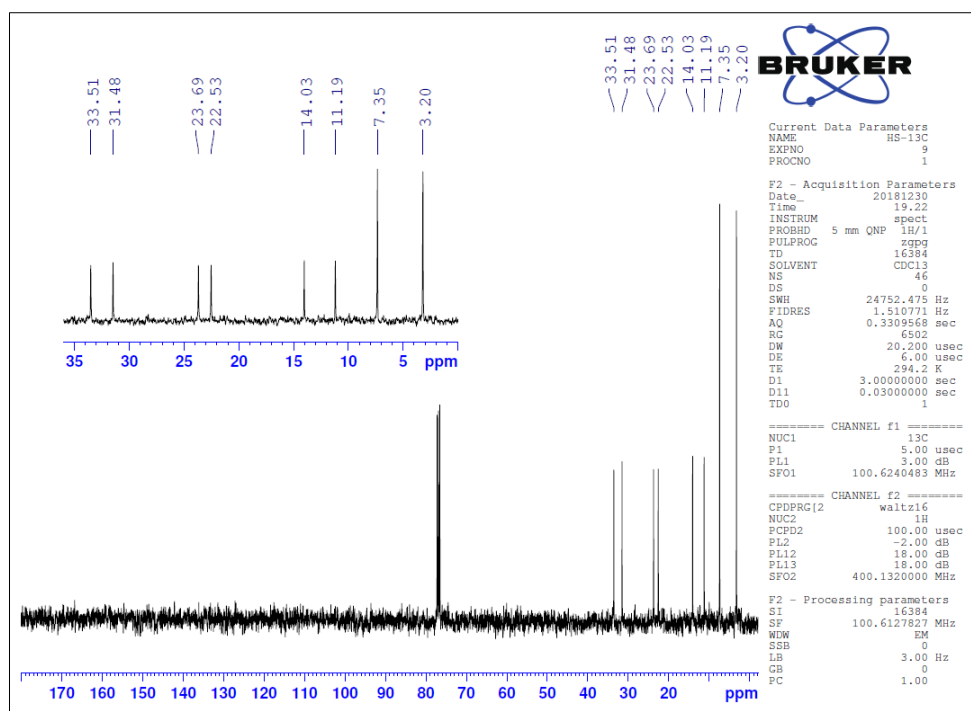

**Figure S22.**  $^{13}\text{C}$  NMR spectrum of 1-hexene hydrosilylation product (Table S1, entry 1) ( $\text{CDCl}_3$ , 100.61 MHz).

Hydrosilylation of 1-hexene with  $\text{PhSiH}_3$  (Table S1, entry 2):

Reaction was performed in 1,2-difluorobenzene at 100 °C. According to  $^{13}\text{C}$  NMR a mixture of hydrosilylation products was obtained.  $^1\text{H}$  NMR ( $\text{CDCl}_3$ , 400.13 MHz):  $\delta$  0.56-1.34 (m,  $\text{CH}_3(\text{CH}_2)_4\text{CH}_2\text{Si}$ , 13H), 3.50 (s,  $\text{SiH}_2$ , 2H), 3.72 (s,  $\text{SiH}_2$ , 2H), 3.80 (s,  $\text{SiH}_2$ , 2H), 4.32 (s,  $\text{SiH}_2$ , 2H), 7.28-7.57 (m, Ar-H, 10H), 6.88-7.05 (m, DFB solvent).  $^{29}\text{Si}$  NMR ( $\text{CDCl}_3$ , 79.5 MHz):  $\delta$  -32.0 ( $\text{PhH}_2\text{SiR}$ ).

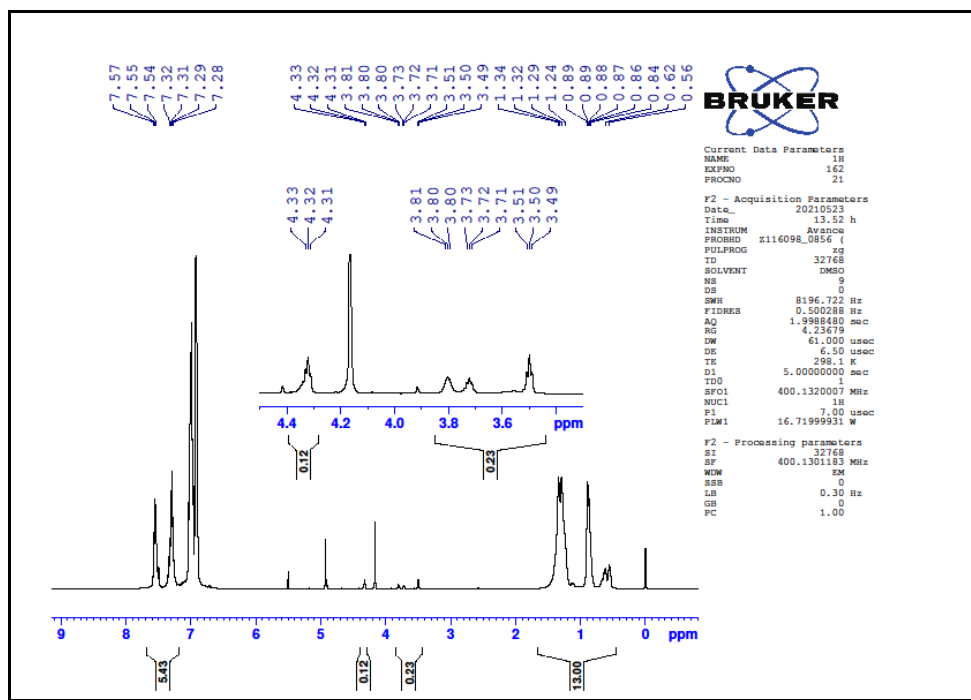

**Figure S23.**  $^1\text{H}$  NMR spectrum of 1-hexene hydrosilylation product (Table S1, entry 2) ( $\text{CDCl}_3$ , 400.13 MHz).

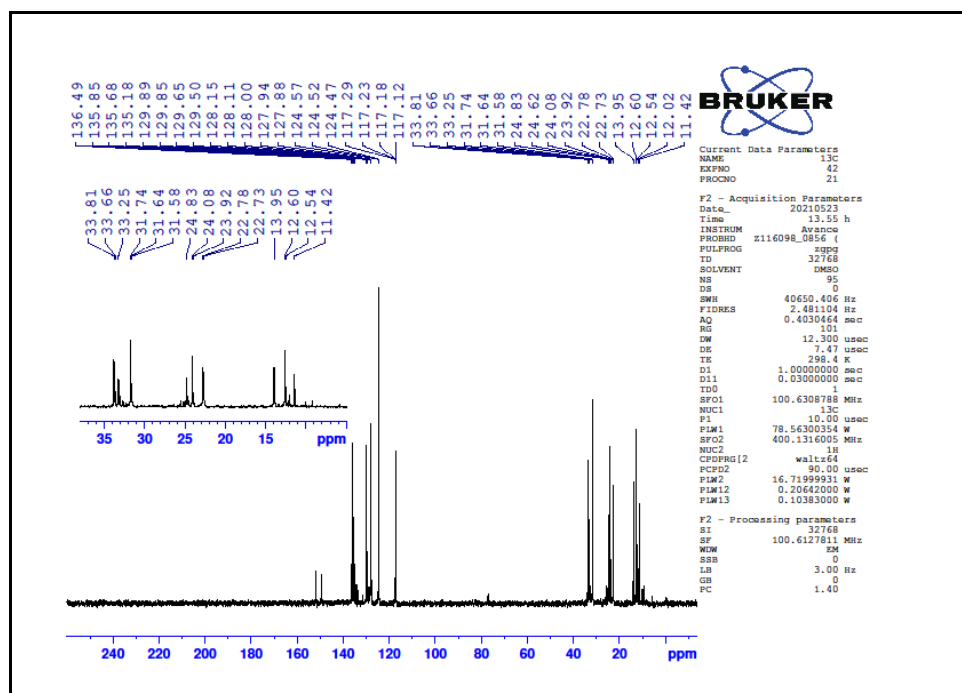

**Figure S24.**  $^{13}\text{C}$  NMR spectrum of 1-hexene hydrosilylation product (Table S1, entry 2) ( $\text{CDCl}_3$ , 100.61 MHz).

Hydrosilylation of 1-hexene with Ph<sub>2</sub>SiH<sub>2</sub> (Table S1, entry 3):

Reaction was performed in 1,2-difluorobenzene at 100 °C. According to <sup>13</sup>C NMR a mixture of hydrosilylation products was obtained. <sup>1</sup>H NMR (CDCl<sub>3</sub>, 400.13 MHz): δ 0.50-1.48 (m, CH<sub>3</sub>(CH<sub>2</sub>)<sub>4</sub>CH<sub>2</sub>Si, 13H), 3.48 (t, SiH, 1H), 3.66 (t, SiH, 1H), 3.71 (t, SiH, 1H), 4.29 (t, SiH, 1H), 4.87 (t, SiH, 1H), 7.33-7.58 (m, Ar-H, 10H), 6.98-7.15 (m, DFB solvent). <sup>29</sup>Si NMR (CDCl<sub>3</sub>, 79.5 MHz): δ -17.3 (Ph<sub>2</sub>HSiR).

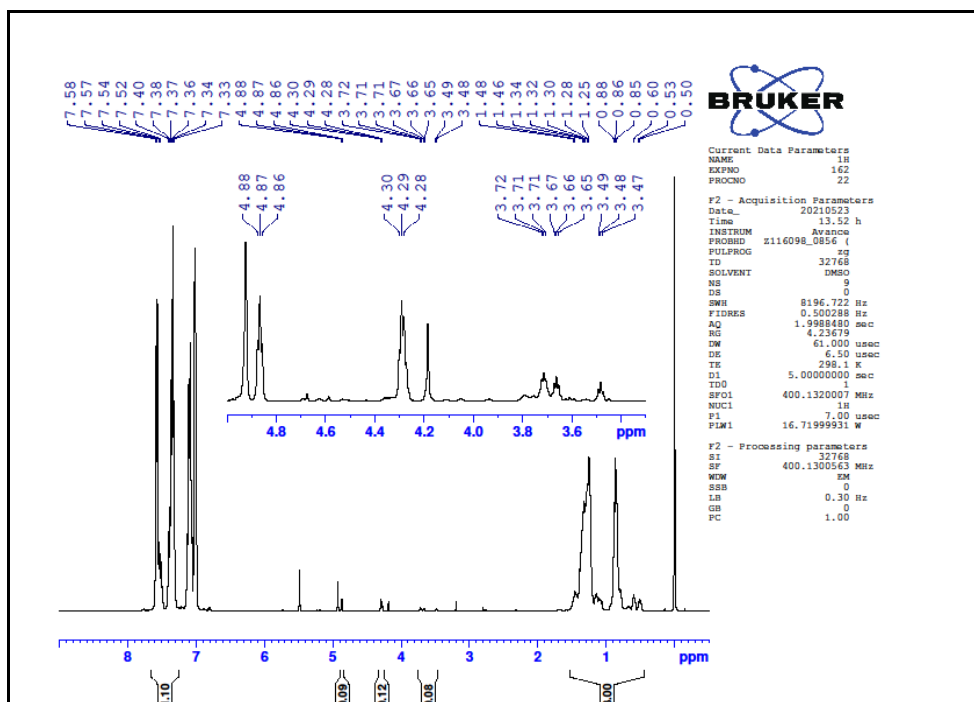

**Figure S25.** <sup>1</sup>H NMR spectrum of 1-hexene hydrosilylation product (Table S1, entry 3) (CDCl<sub>3</sub>, 400.13 MHz).

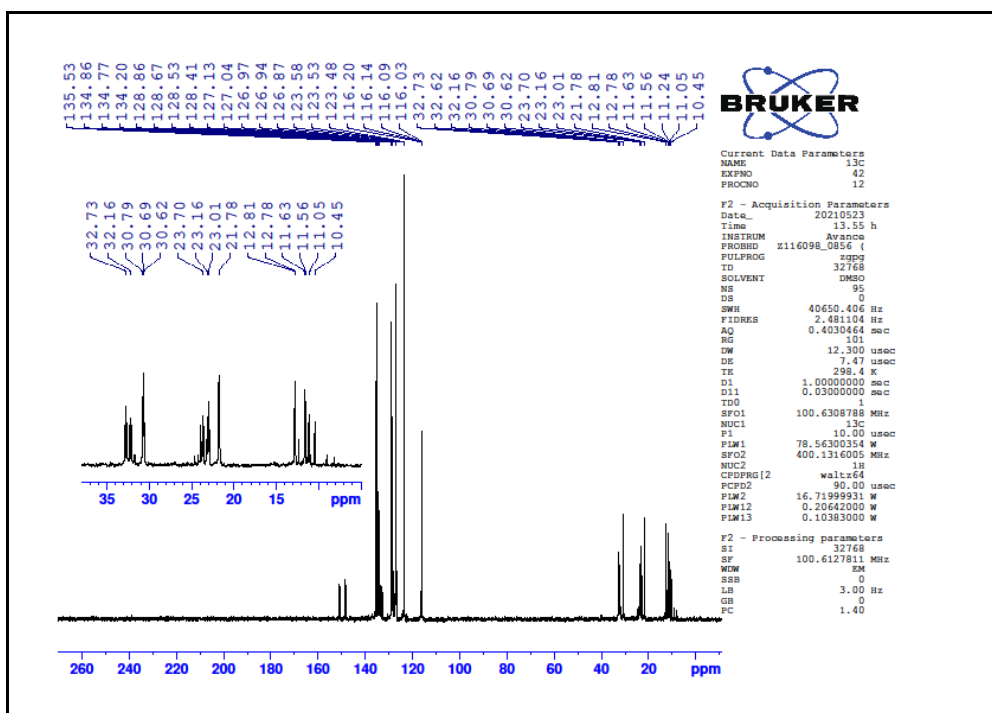

**Figure S26.**  $^{13}\text{C}$  NMR spectrum of 1-hexene hydrosilylation product (Table S1, entry 3) ( $\text{CDCl}_3$ , 100.61 MHz).

Hydrosilylation of 1-hexene with  $\text{Me}_2\text{ClSiH}$  (Table S1, entry 4):

Reaction was performed in 1,2-difluorobenzene at 100 °C.  $^1\text{H}$  NMR ( $\text{CDCl}_3$ , 400.13 MHz):  $\delta$  0.36 (s,  $\text{SiCH}_3$ , 6H), 0.75 (m,  $\text{SiCH}_2$ , 2H), 0.87 (t,  $J = 6.7$  Hz,  $\text{CH}_3$ , 3H), 1.32 (m,  $\text{CH}_2$ , 8H), 6.98 (m, DFB solvent), 7.23 (m, DFB solvent).  $^{13}\text{C}$  NMR ( $\text{CDCl}_3$ , 100.61 MHz): 33.16 ( $\text{CH}_2$ ), 31.93 ( $\text{CH}_2$ ), 23.42 ( $\text{CH}_2$ ), 23.07 ( $\text{CH}_2$ ), 19.31 ( $\text{CH}_3$ ), 14.49 ( $\text{SiCH}_2$ ), 1.08 ( $\text{SiCH}_3$ ).  $^{29}\text{Si}$  NMR ( $\text{CDCl}_3$ , 79.5 MHz):  $\delta$  14.5 ( $\text{Me}_2\text{ClSiR}$ ).



Hydrosilylation of 1-hexene with Ph<sub>2</sub>ClSiH (Table S1, entry 5):

Reaction was performed in neat Ph<sub>2</sub>SiClH and 1-hexene (1:1), at 100 °C for 3 h. According to <sup>13</sup>C NMR, there are 2 major hydrosilylation products. <sup>1</sup>H NMR (CDCl<sub>3</sub>, 400.13 MHz): δ 0.84-1.50 (m, Alk-H, 13H), 7.32-7.73 (m, Ar-H, 10H). <sup>29</sup>Si NMR (CDCl<sub>3</sub>, 79.5 MHz): δ 8.4 (Ph<sub>2</sub>ClSiR).

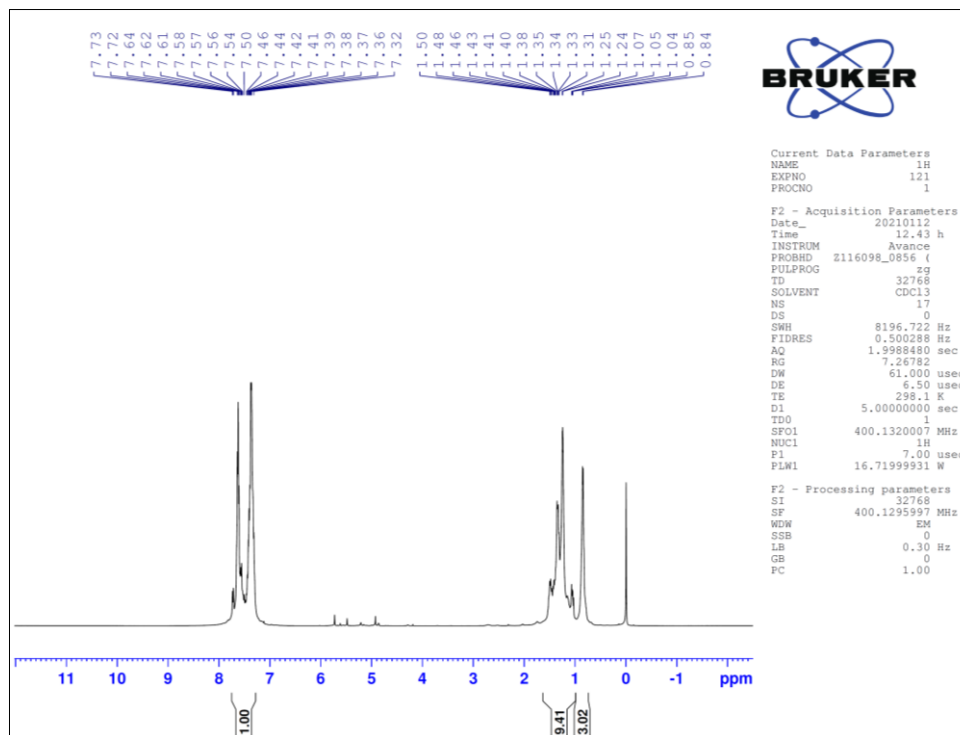

**Figure S29.** <sup>1</sup>H NMR spectrum of 1-hexene hydrosilylation product (Table S1, entry 5) (CDCl<sub>3</sub>, 400.13 MHz)

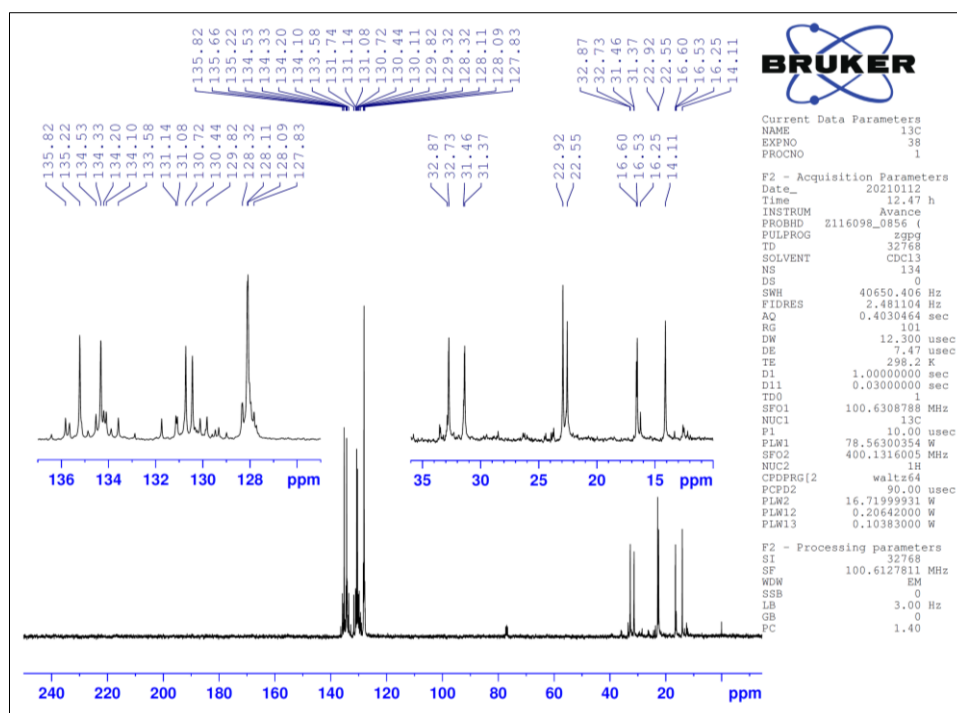

**Figure S30.**  $^{13}\text{C}$  NMR spectrum of 1-hexene hydrosilylation product (Table S1, entry 5) ( $\text{CDCl}_3$ , 100.61 MHz).

Hydrosilylation of styrene with  $\text{Et}_3\text{SiH}$  (Table S1, entry 6):

Reaction was performed in 1,2-difluorobenzene, in 120 °C for 3 h.  $^1\text{H}$  NMR ( $\text{CDCl}_3$ , 400.13 MHz):  $\delta$  7.16-7.30 (m,  $\text{CH}(\text{Ph})$ , 5H), 2.62 (m,  $\text{CH}_2$ , 2H), 0.96 (t,  $J = 7.8$  Hz,  $\text{SiCH}_2\text{CH}_3$ , 9H), 0.89 (m,  $\text{SiCH}_2$ , 2H), 0.55 (q,  $J = 7.8$  Hz,  $\text{SiCH}_2\text{CH}_3$ , 6H).  $^{13}\text{C}$  NMR ( $\text{CDCl}_3$ , 100.61 MHz): 131.51 (*i*-C(Ph)), 129.76 (*m*-C(Ph)), 129.17 (*o*-C(Ph)), 126.93 (*p*-C(Ph)), 31.51 ( $\text{CH}_2$ ), 15.12 ( $\text{SiCH}_2$ ), 8.92 ( $\text{SiCH}_2\text{CH}_3$ ), 4.74 ( $\text{SiCH}_2\text{CH}_3$ ).  $^{29}\text{Si}$  NMR ( $\text{CDCl}_3$ , 79.5 MHz):  $\delta$  6.8 ( $\text{Et}_3\text{SiR}$ ).



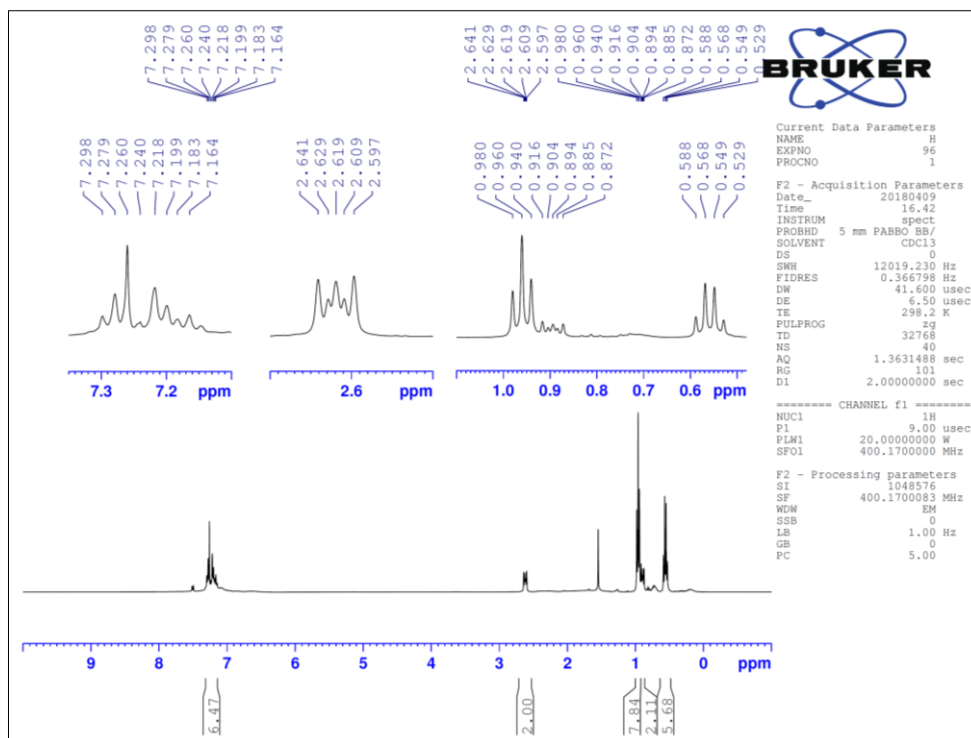

**Figure S31.**  $^1\text{H}$  NMR spectrum of styrene hydrosilylation product (Table S1, entry 6) ( $\text{CDCl}_3$ , 400.13 MHz).

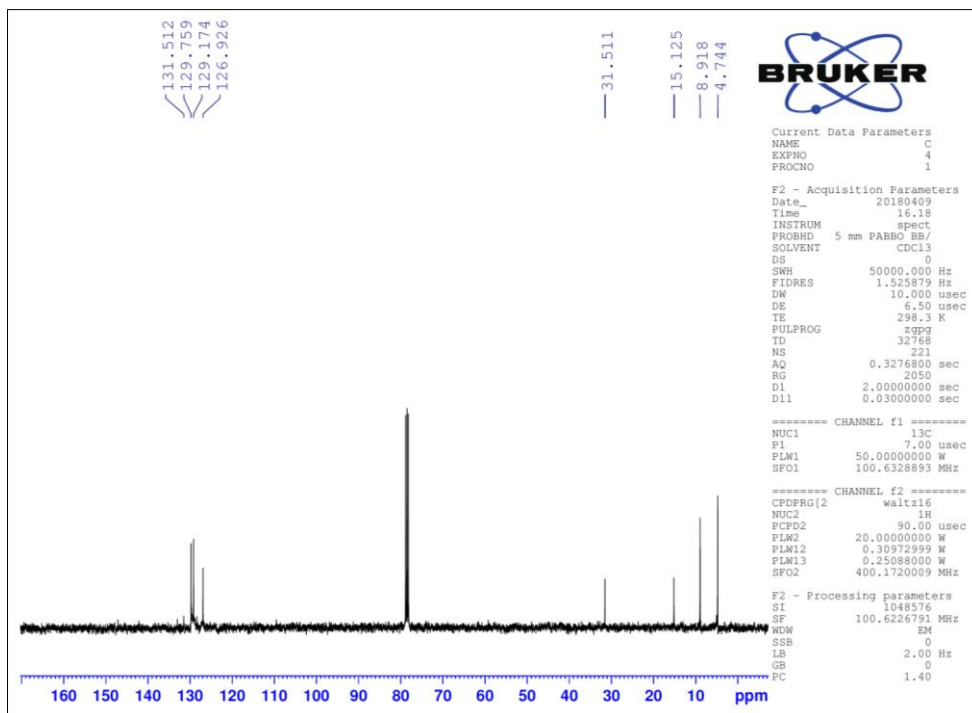

**Figure S32.**  $^{13}\text{C}$  NMR spectrum of styrene hydrosilylation product (Table S1, entry 6) ( $\text{CDCl}_3$ , 100.61 MHz).

Hydrosilylation of 1,1-diethylethene with Et<sub>3</sub>SiH (Table S1, entry 7):

Reaction was performed in 1,2-difluorobenzene, in 120 °C for 3 h. <sup>1</sup>H NMR (CDCl<sub>3</sub>, 400.13 MHz): δ 1.23-1.36 (m, CH<sub>2</sub>CH<sub>3</sub>, 4H), 1.28 (obscured, CH, 1H), 0.93 (t, J = 7.8 Hz, SiCH<sub>2</sub>CH<sub>3</sub>, 9H), 0.83 (t, J = 7.4 Hz, CH<sub>2</sub>CH<sub>3</sub>, 6H), 0.51 (q, J = 7.8 Hz, SiCH<sub>2</sub>, 6H), 0.49 (d, CH<sub>2</sub>, 2H). <sup>13</sup>C NMR (CDCl<sub>3</sub>, 100.61 MHz): 36.78 (CH), 28.52 (CH<sub>2</sub>), 15.78 (CH<sub>2</sub>), 10.96 (CH<sub>3</sub>), 7.65 (SiCH<sub>2</sub>), 4.15 (SiCH<sub>2</sub>CH<sub>3</sub>). <sup>29</sup>Si NMR (CDCl<sub>3</sub>, 79.5 MHz): δ 5.1 (Et<sub>3</sub>SiR).

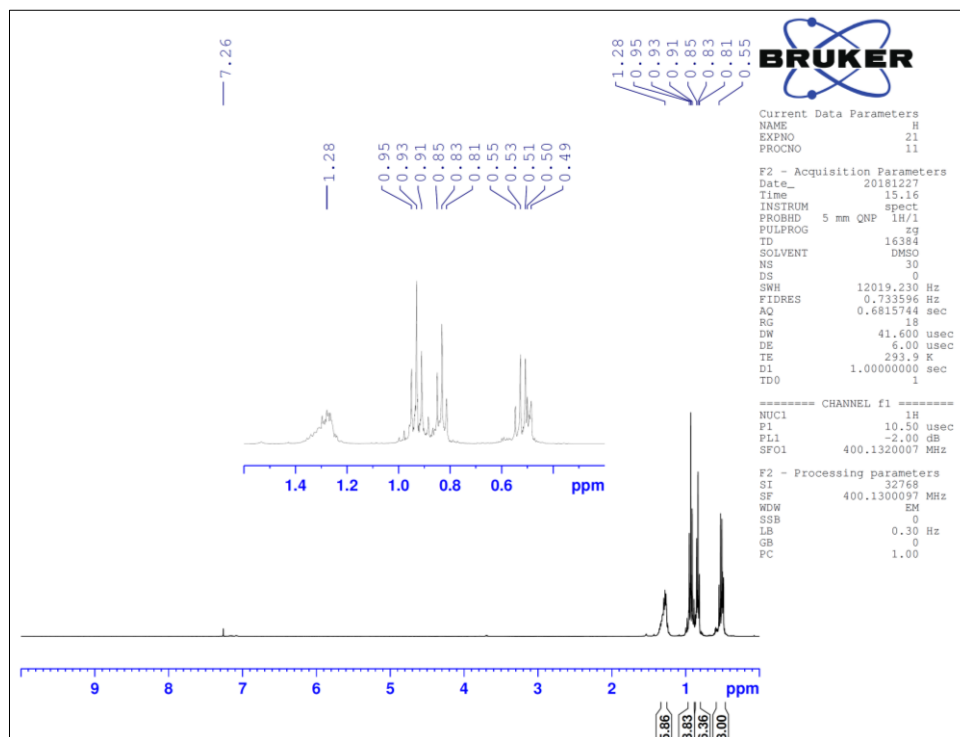

**Figure S33.** <sup>1</sup>H NMR spectrum of 1,1-diethylethene hydrosilylation product (Table S1, entry 7) (CDCl<sub>3</sub>, 400.13 MHz).

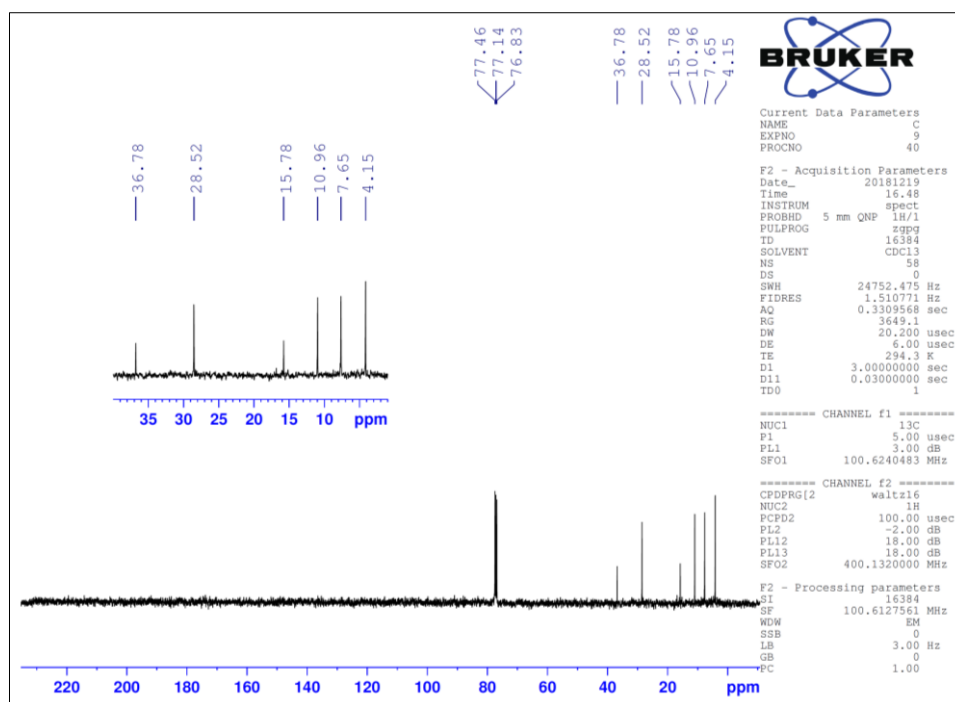

**Figure S34.**  $^{13}\text{C}$  NMR spectrum of 1,1-diethylethene hydrosilylation product (Table S1, entry 7) ( $\text{CDCl}_3$ , 100.61 MHz).

Hydrosilylation of 1,1-diethylethene with  $\text{Ph}_2\text{SiClH}$  (Table S1, entry 8):

Reaction was performed in neat  $\text{Ph}_2\text{SiClH}$  and 1,1-diethylethene (1:1), at 100 °C for 12 h. According to  $^{13}\text{C}$  NMR a mixture of hydrosilylation products was obtained.  $^1\text{H}$  NMR ( $\text{CDCl}_3$ , 400.13 MHz):  $\delta$  0.91-1.82 (m, Alk-H, 13H), 7.44-7.82 (m, Ar-H, 10H).

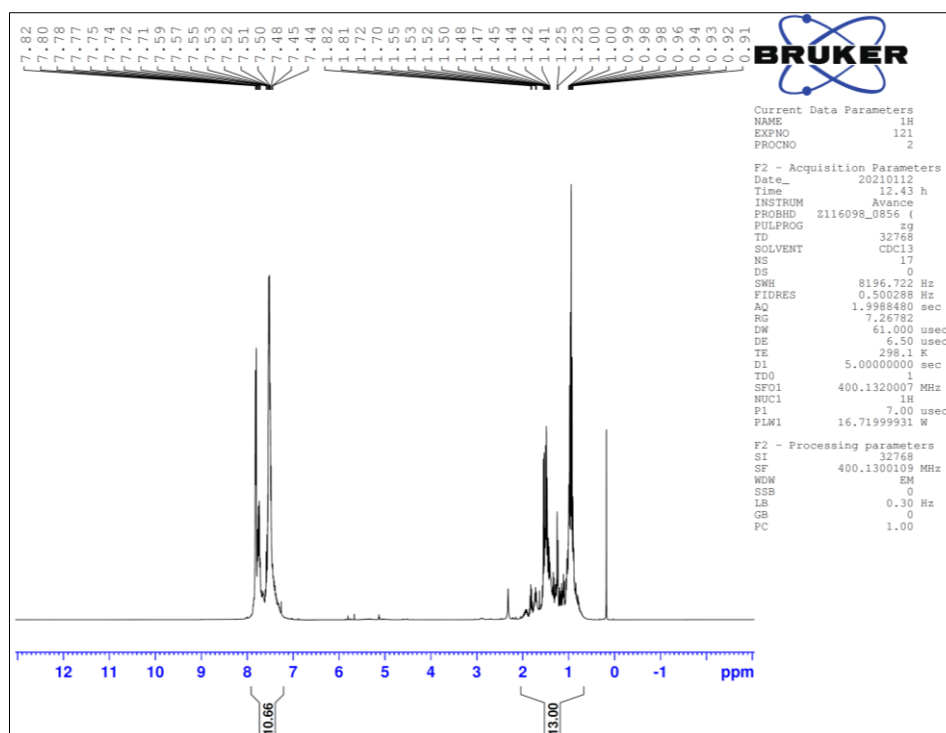

**Figure S35.**  $^1\text{H}$  NMR spectrum of 1,1-diethylethene hydrosilylation product (Table S1, entry 8) ( $\text{CDCl}_3$ , 400.13 MHz).

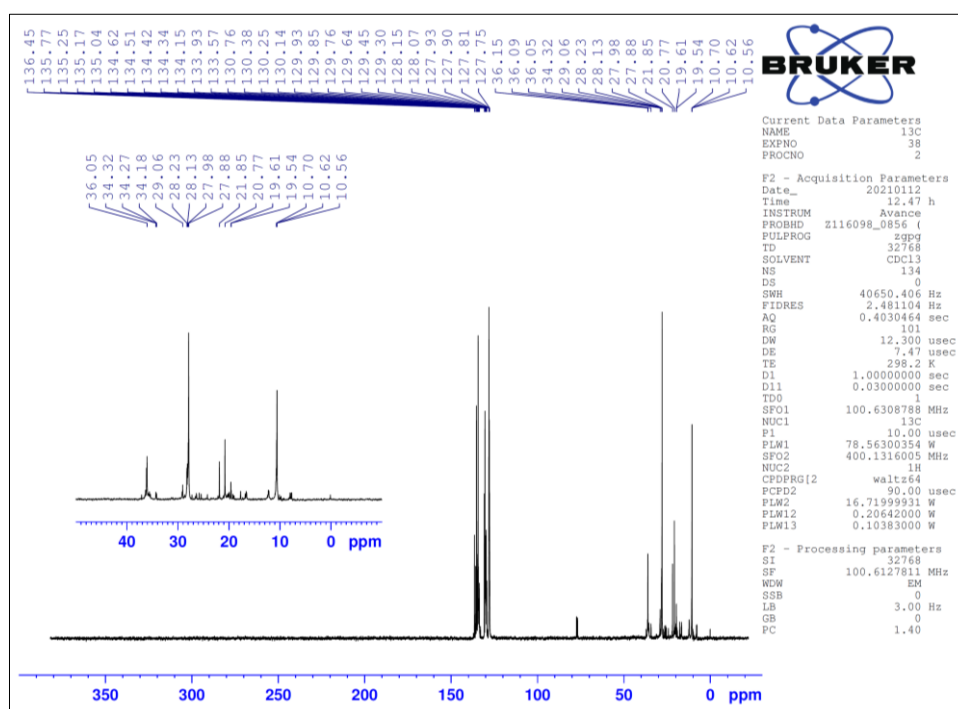

**Figure S36.**  $^{13}\text{C}$  NMR spectrum of 1,1-diethylethene hydrosilylation product (Table S1, entry 8) ( $\text{CDCl}_3$ , 100.61 MHz).

Hydrosilylation of 2,4,4-trimethylpent-1-ene with Et<sub>3</sub>SiH (Table S1, entry 9):

Reaction was performed in 1,2-difluorobenzene, in 120 °C for 3 h. <sup>1</sup>H NMR (CDCl<sub>3</sub>, 400.13 MHz): δ 1.69-1.78 (m, CH<sub>2</sub>, 2H), 1.12-1.26 (m, CH<sub>3</sub>, 3H), 0.94 (t, J = 7.5 Hz, SiCH<sub>2</sub>CH<sub>3</sub>, 9H), 0.89 (s, CH<sub>3</sub>, 9H), 0.45-0.67 (obscured, SiCH<sub>2</sub>, 2H), 0.45-0.53 (q, J = 7.5 Hz, SiCH<sub>2</sub>CH<sub>3</sub>, 2H). <sup>13</sup>C NMR (CDCl<sub>3</sub>, 100.61 MHz): 55.39 (CH<sub>2</sub>), 30.12 (CH<sub>3</sub>), 25.88 (C), 25.58 (SiCH<sub>2</sub> or CH<sub>3</sub>), 24.11 (SiCH<sub>2</sub> or CH<sub>3</sub>), 23.00 (CH), 7.40 (SiCH<sub>2</sub>CH<sub>3</sub>), 4.02 (SiCH<sub>2</sub>CH<sub>3</sub>). <sup>29</sup>Si NMR (CDCl<sub>3</sub>, 79.5 MHz): δ 4.7 (Et<sub>3</sub>SiR).

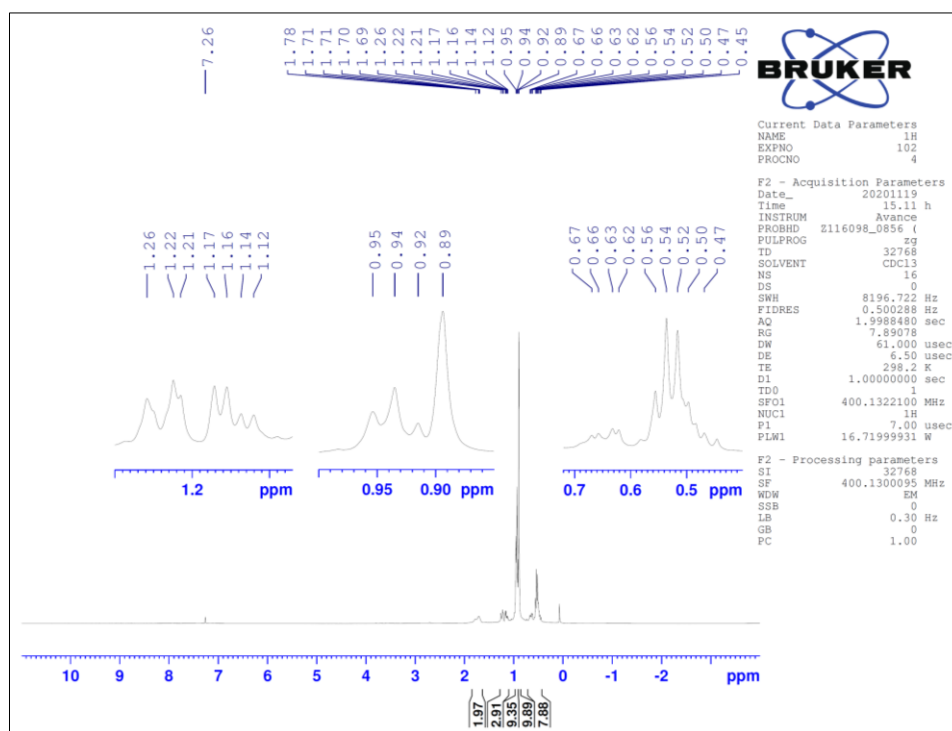

**Figure S37.** <sup>1</sup>H NMR spectrum of 2,4,4-trimethylpent-1-ene hydrosilylation product (Table S1, entry 9) (CDCl<sub>3</sub>, 400.13 MHz).

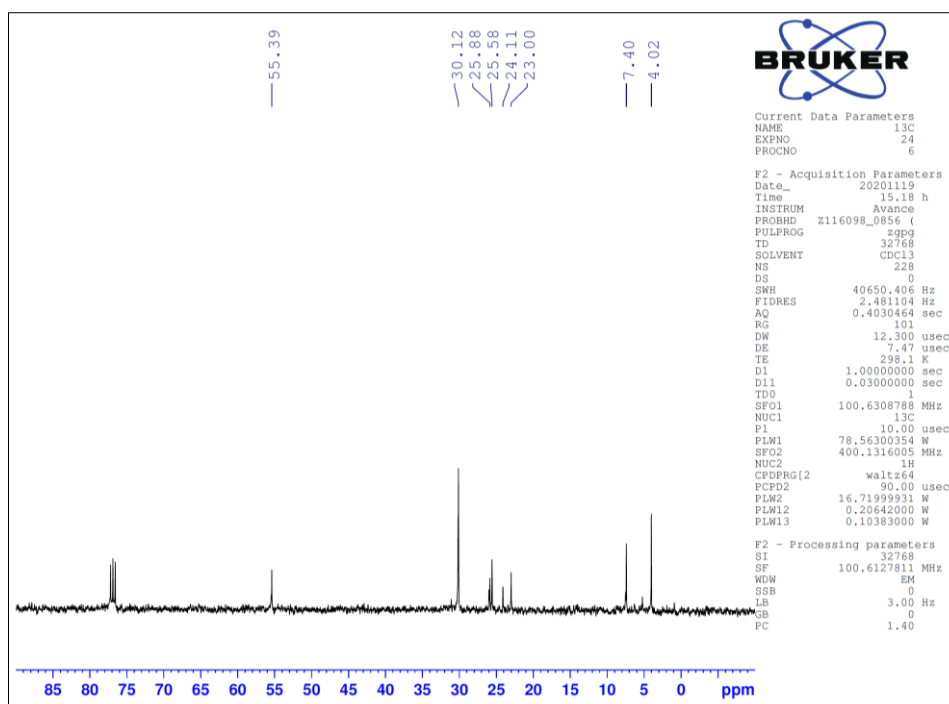

**Figure S38.**  $^{13}\text{C}$  NMR spectrum of 2,4,4-trimethylpent-1-ene hydrosilylation product (Table S1, entry 9) ( $\text{CDCl}_3$ , 100.61 MHz).

Hydrosilylation of 1,1-Diphenylethylene with  $\text{Et}_3\text{SiH}$  (Table S1, entry 10):

Reaction was performed in 1,2-difluorobenzene, in 120 °C for 3 h.  $^1\text{H}$  NMR ( $\text{CDCl}_3$ , 400.13 MHz):  $\delta$  7.13-7.35 (m, CH (Ph), 10H), 4.08 (t,  $J = 7.7$  Hz, CH, 1H), 1.42 (d,  $J = 7.7$  Hz,  $\text{SiCH}_2$ , 2H), 0.84 (t,  $J = 7.7$  Hz,  $\text{SiCH}_2\text{CH}_3$ , 9H), 0.58 (q,  $J = 7.7$  Hz,  $\text{SiCH}_2\text{CH}_3$ , 6H).  $^{13}\text{C}$  NMR ( $\text{CDCl}_3$ , 100.61 MHz): 147.45 (*i*-C(Ph)), 128.45 (*m*-C(Ph)), 127.63 (*o*-C(Ph)), 126.11 (*p*-C(Ph)), 47.25 (CH), 19.13 ( $\text{SiCH}_2$ ), 7.48 ( $\text{SiCH}_2\text{CH}_3$ ), 3.58 ( $\text{SiCH}_2\text{CH}_3$ ).  $^{29}\text{Si}$  NMR ( $\text{CDCl}_3$ , 79.5 MHz):  $\delta$  6.4 ( $\text{Et}_3\text{SiR}$ ).  $^{29}\text{Si}$  NMR ( $\text{CDCl}_3$ , 79.5 MHz):  $\delta$  8.7 ( $\text{Et}_3\text{SiR}$ ).

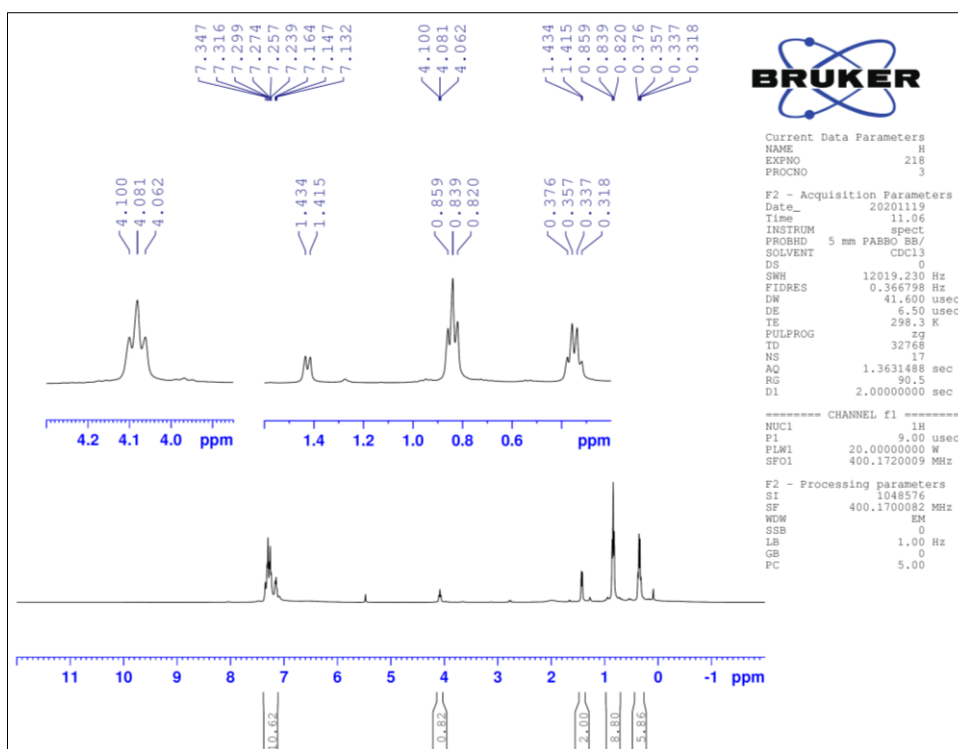

**Figure S39.**  $^1\text{H}$  NMR spectrum of 1,1-Diphenylethylene hydrosilylation product (Table S1, entry 10) ( $\text{CDCl}_3$ , 400.13 MHz).

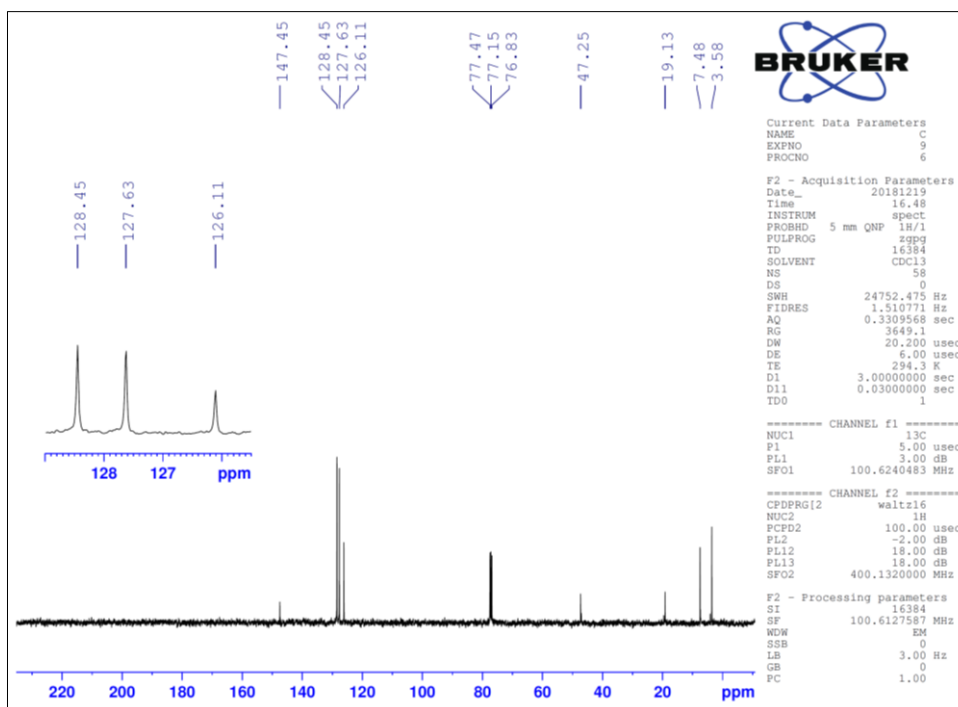

**Figure S40.**  $^{13}\text{C}$  NMR spectrum of 1,1-Diphenylethylene hydrosilylation product (Table S1, entry 10) ( $\text{CDCl}_3$ , 100.61 MHz).

Hydrosilylation of *trans*-stilbene with Et<sub>3</sub>SiH (Table S1, entry 11):

Reaction was performed in 1,2-difluorobenzene, in 120 °C for 3 h. <sup>1</sup>H NMR (CDCl<sub>3</sub>, 400.13 MHz): δ 7.05-7.55 (m, CH(Ph), 10H), 3.12 (d, J = 6.2 Hz, SiCH<sub>2</sub>, 2H), 2.54 (t, J = 6.2 Hz, CH, 1H), 0.95 (t, J = 7.6 Hz, SiCH<sub>2</sub>CH<sub>3</sub>, 9H), 0.60 (q, J = 7.6 Hz, SiCH<sub>2</sub>CH<sub>3</sub>, 6H). <sup>13</sup>C NMR (CDCl<sub>3</sub>, 100.61 MHz): 130.18 (C(Ph)), 129.87 (C(Ph)), 129.67 (C(Ph)), 129.48 (C(Ph)), 129.12 (C(Ph)), 128.01 (C(Ph)), 127.00 (C(Ph)), 125.87 (C(Ph)), 37.73 (CH or SiCH<sub>2</sub>), 37.61 (CH or SiCH<sub>2</sub>), 9.03 (SiCH<sub>2</sub>CH<sub>3</sub>), 3.96 (SiCH<sub>2</sub>CH<sub>3</sub>). <sup>29</sup>Si NMR (CDCl<sub>3</sub>, 79.5 MHz): δ 8.6 (Et<sub>3</sub>SiR).

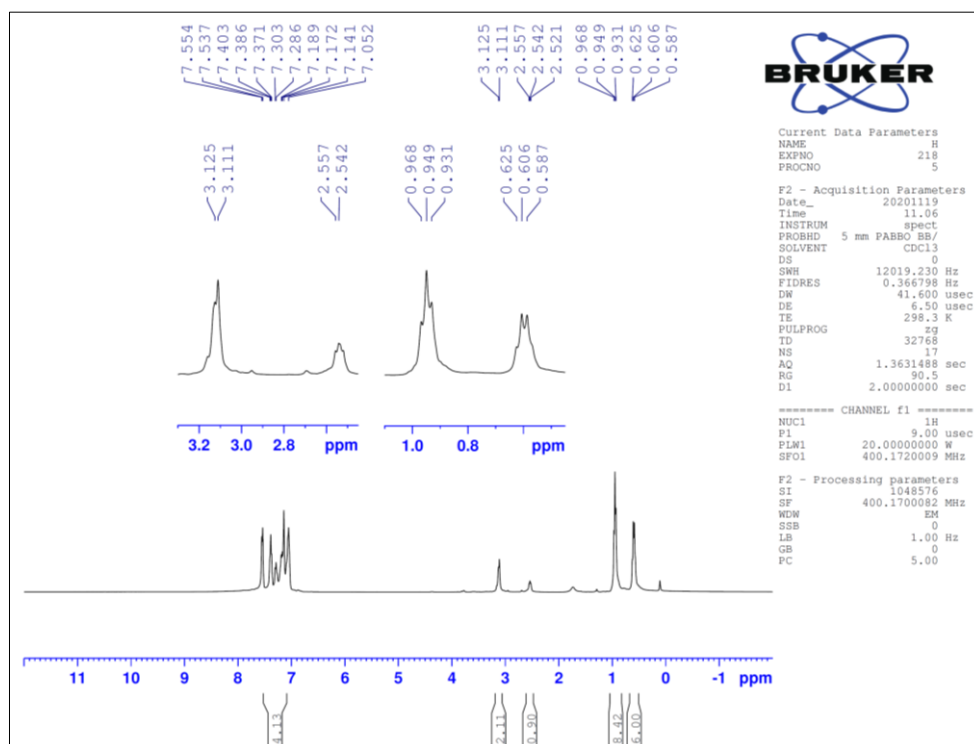

**Figure S41.** <sup>1</sup>H NMR spectrum of *trans*-stilbene hydrosilylation product (Table S1, entry 11) (CDCl<sub>3</sub>, 400.13 MHz).



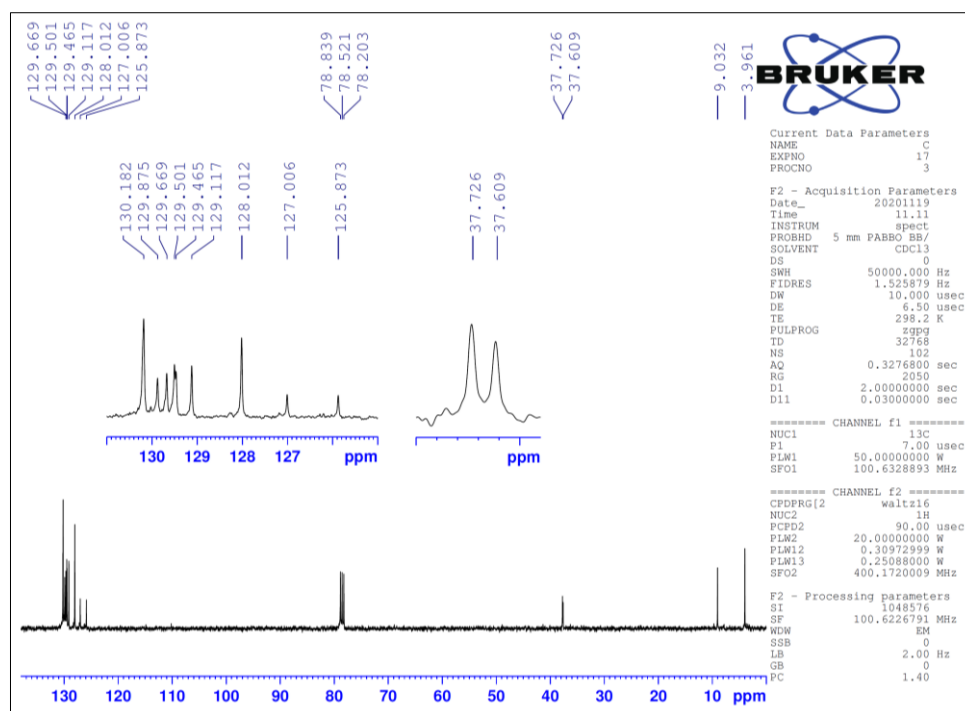

**Figure S42.**  $^{13}\text{C}$  NMR spectrum of trans-stilbene hydrosilylation product (Table S1, entry 11) ( $\text{CDCl}_3$ , 100.61 MHz).

Hydrosilylation of 2-methyl-2-butene with  $\text{Et}_3\text{SiH}$  (Table S1, entry 12):

Reaction was performed in 1,2-difluorobenzene, in 120 °C for 3 h.  $^1\text{H}$  NMR ( $\text{CDCl}_3$ , 400.13 MHz):  $\delta$  1.86-1.90 (m, CH, 1H), 0.96 (t,  $J = 7.8$  Hz, CH, 9H), 0.96 (d, obscured,  $\text{CH}_3$ , 3H), 0.88 (m,  $\text{CH}_3$ , 6H), 0.80 (m, SiCH, 1H), 0.58 (q,  $J = 7.8$  Hz, Si $\text{CH}_2\text{CH}_3$ , 6H).  $^{13}\text{C}$  NMR ( $\text{CDCl}_3$ , 100.61 MHz): 28.41 ( $\text{CH}_3$ ), 23.88 ( $\text{CH}_3$ ), 23.06 ( $\text{CH}_3$ ), 19.70 (CH), 9.23 (CH), 7.63 (Si $\text{CH}_2\text{CH}_3$ ), 3.07 (Si $\text{CH}_2\text{CH}_3$ ).  $^{29}\text{Si}$  NMR ( $\text{CDCl}_3$ , 79.5 MHz):  $\delta$  5.6 ( $\text{Et}_3\text{SiR}$ ).

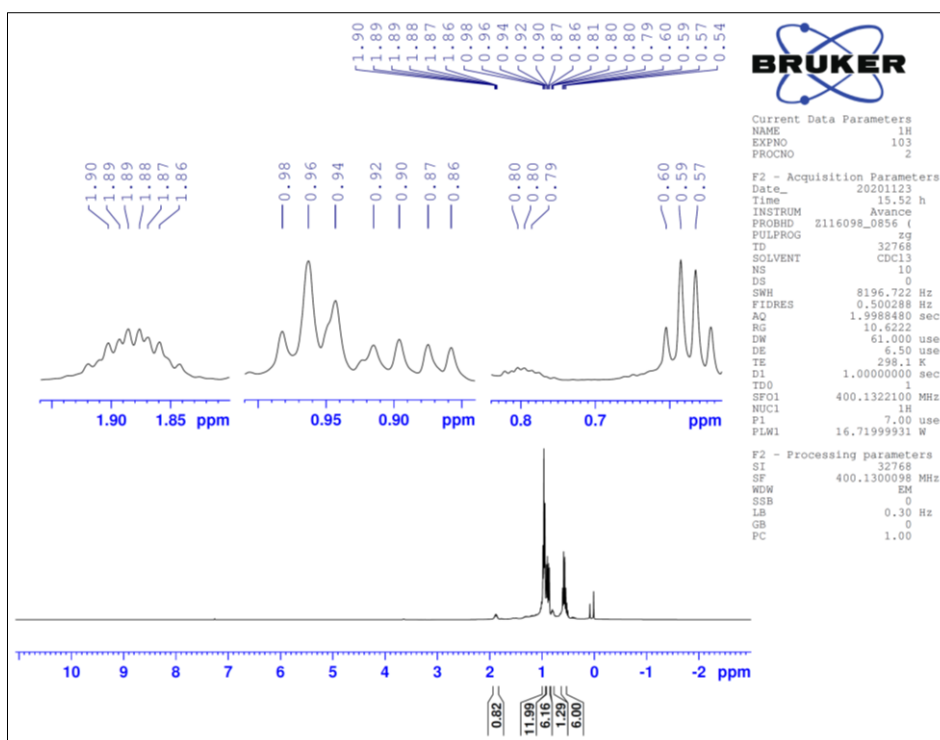

**Figure S43.**  $^1\text{H}$  NMR spectrum of 2-methyl-2-butene hydrosilylation product (Table S1, entry 12) ( $\text{CDCl}_3$ , 400.13 MHz).

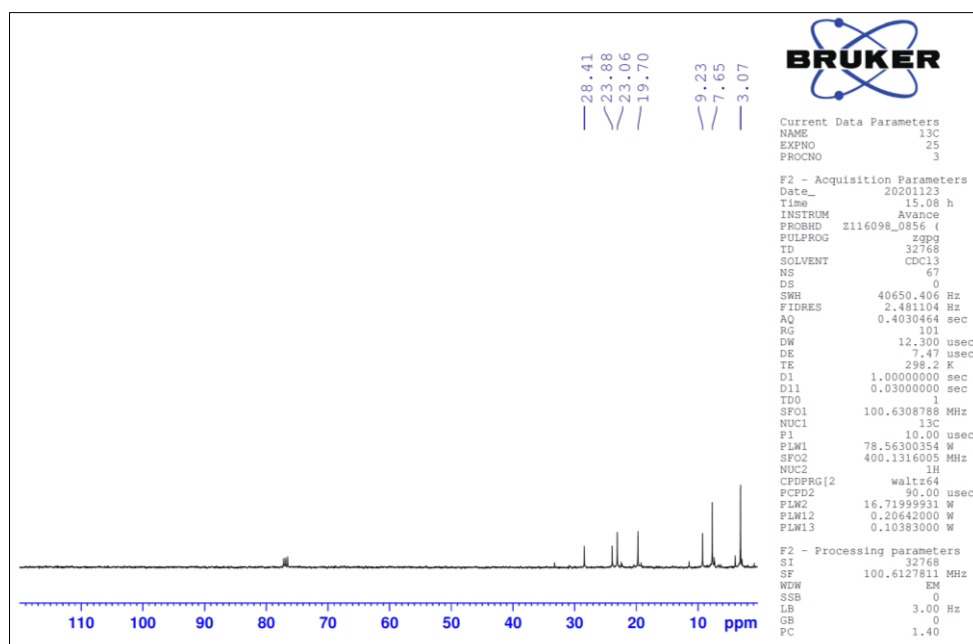

**Figure S44.**  $^{13}\text{C}$  NMR spectrum of 2-methyl-2-butene hydrosilylation product (Table S1, entry 12) ( $\text{CDCl}_3$ , 100.61 MHz).

Hydrosilylation of cyclohexene with Et<sub>3</sub>SiH (Table S1, entry 13):

Reaction was performed in 1,2-difluorobenzene, in 120 °C for 3 h. <sup>1</sup>H NMR (CDCl<sub>3</sub>, 400.13 MHz): δ 1.71 (m, CH<sub>2</sub>, 5H), 1.19 (m, CH<sub>2</sub>, 6H), 0.94 (t, J = 7.1 Hz, SiCH<sub>2</sub>CH<sub>3</sub>, 9H), 0.51 (q, J = 7.1 Hz, SiCH<sub>2</sub>CH<sub>3</sub>, 6H). <sup>13</sup>C NMR (CDCl<sub>3</sub>, 100.61 MHz): 29.99 (CH<sub>2</sub>), 29.85 (CH<sub>2</sub>), 29.41 (CH<sub>2</sub>), 28.62 (CH<sub>2</sub>), 25.12 (SiCH<sub>2</sub>), 9.14 (SiCH<sub>2</sub>CH<sub>3</sub>), 3.44 (SiCH<sub>2</sub>CH<sub>3</sub>). <sup>29</sup>Si NMR (CDCl<sub>3</sub>, 79.5 MHz): δ 5.3 (Et<sub>3</sub>SiR).

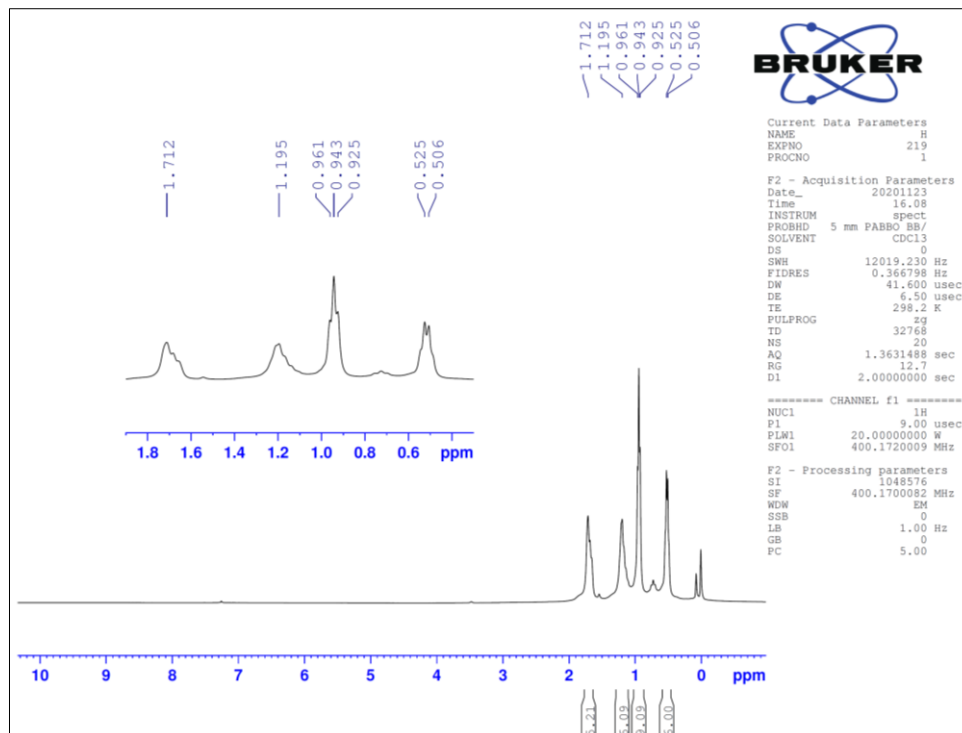

**Figure S45.** <sup>1</sup>H NMR spectrum of cyclohexene hydrosilylation product (Table S1, entry 13) (CDCl<sub>3</sub>, 400.13 MHz).

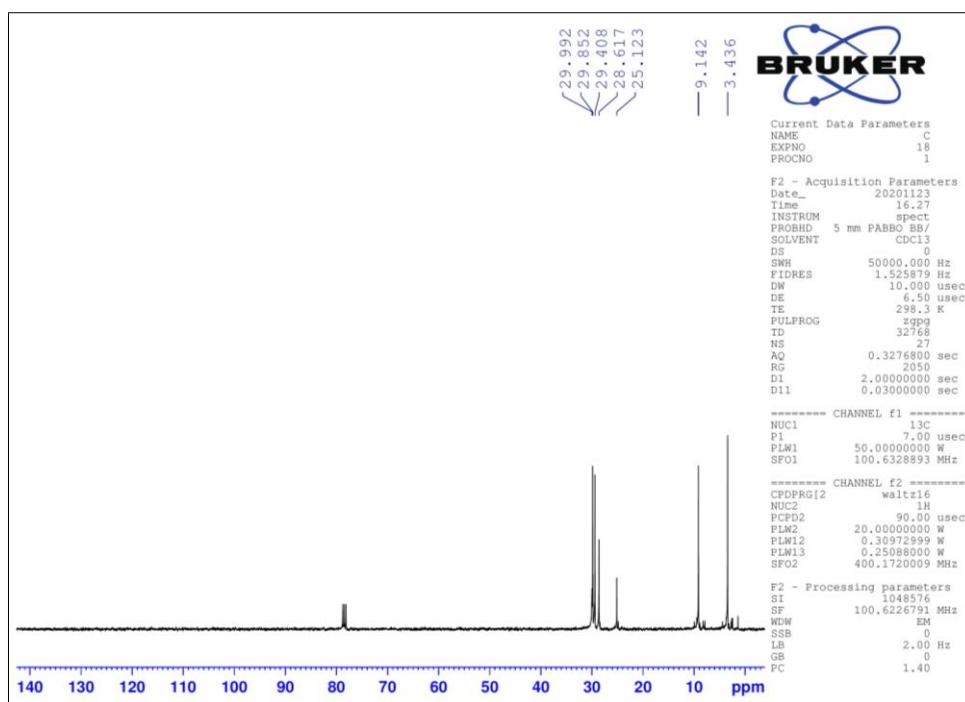

**Figure S46.**  $^{13}\text{C}$  NMR spectrum of cyclohexene hydrosilylation product (Table S1, entry 13) ( $\text{CDCl}_3$ , 100.61 MHz).

Hydrosilylation of diphenylacetylene with  $\text{Et}_3\text{SiH}$  (Table S1, entry 14):

Reaction was performed in 1,2-difluorobenzene, in 80 °C for 3 h.  $^1\text{H}$  NMR ( $\text{CDCl}_3$ , 400.13 MHz):  $\delta$  0.49 (q,  $J = 7.9$  Hz,  $\text{SiCH}_2\text{CH}_3$ , 6H), 0.89 (t,  $J = 7.9$  Hz,  $\text{SiCH}_2\text{CH}_3$ , 9H), 7.27-7.64 (m,  $\text{CH}(\text{Ph})$ , 10H), 7.41 (s, CH, 1H).  $^{13}\text{C}$  NMR ( $\text{CDCl}_3$ , 100.61 MHz): 147.49 (*i*-C(Ph)), 146.17 (C(Ph)), 145.08 (CSi( $\text{Et}_3$ )), 139.87 (*i*-C(Ph)), 131.54 (CH), 128.24 (C(Ph)), 128.17 (C(Ph)), 127.79 (C(Ph)), 127.70 (C(Ph)), 127.31 (C(Ph)), 127.10 (C(Ph)), 125.51 (C(Ph)), 7.46 ( $\text{SiCH}_2$ ), 4.60 ( $\text{SiCH}_2\text{CH}_3$ ).  $^{29}\text{Si}$  NMR ( $\text{CDCl}_3$ , 79.5 MHz):  $\delta$  -3.1 ( $\text{Et}_3\text{SiR}$ ).

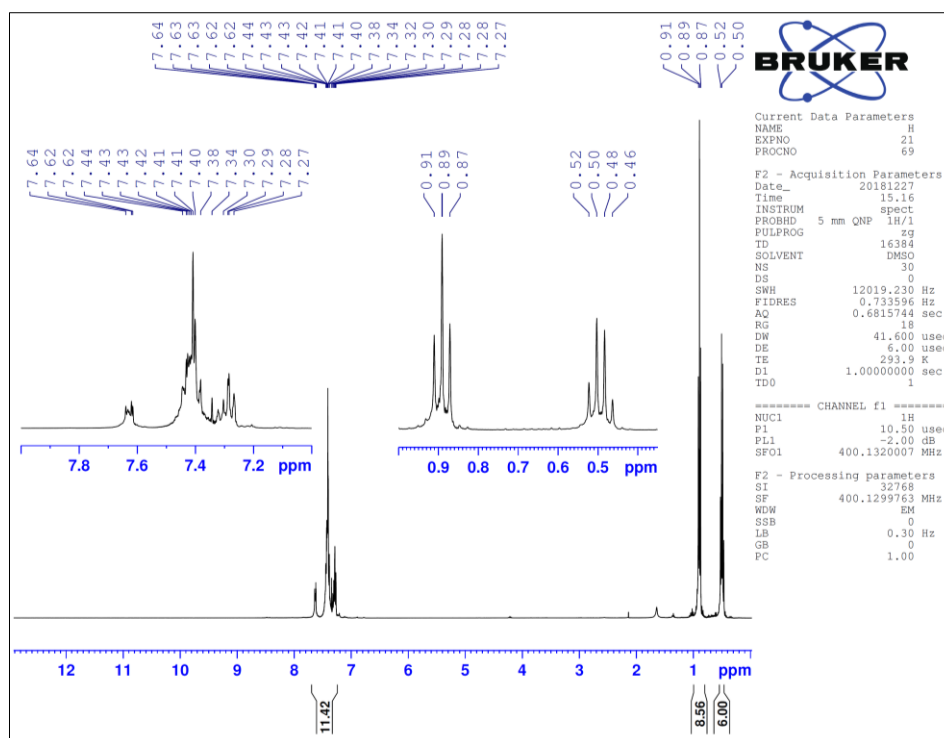

**Figure S47.**  $^1\text{H}$  NMR spectrum of diphenylacetylene hydrosilylation product (Table S1, entry 14) ( $\text{CDCl}_3$ , 400.13 MHz).

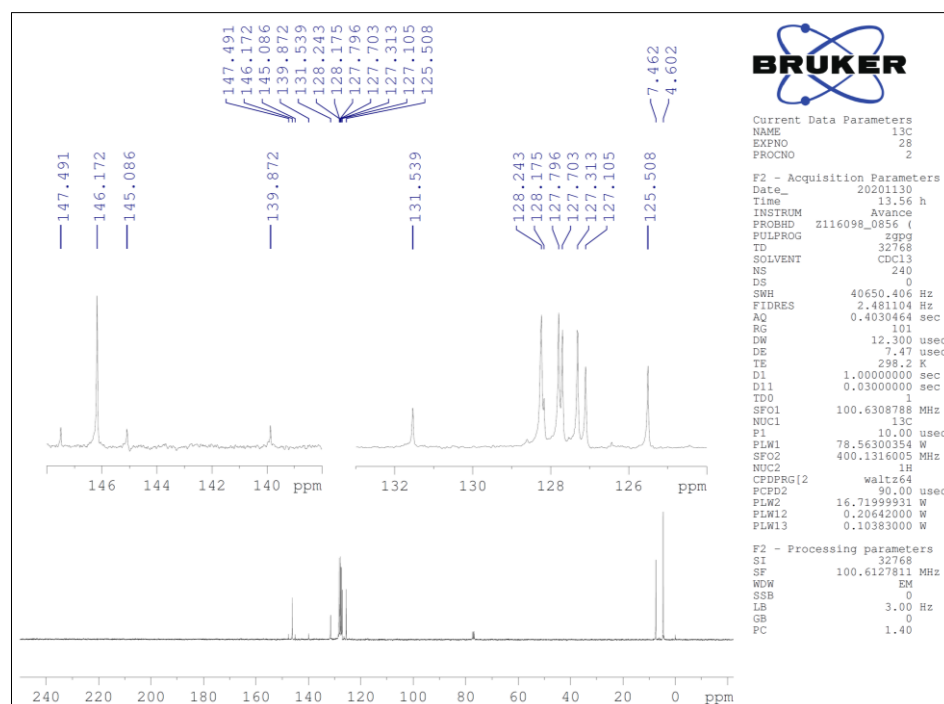

**Figure S48.**  $^{13}\text{C}$  NMR spectrum of diphenylacetylene hydrosilylation product (Table S1, entry 14) ( $\text{CDCl}_3$ , 100.61 MHz).

### Hydrosilylation of ethynylcyclohexane with Et<sub>3</sub>SiH (Table S1, entry 15):

Reaction was performed in 1,2-difluorobenzene, in 80 °C for 3 h. <sup>1</sup>H NMR (CDCl<sub>3</sub>, 400.13 MHz): δ 0.60 (q, J = 7.7 Hz, SiCH<sub>2</sub>CH<sub>3</sub>, 6H), 0.95 (t, J = 7.7 Hz, SiCH<sub>2</sub>CH<sub>3</sub>, 9H), 1.07-1.31 (m, CH<sub>2</sub>, 5H), 1.58-1.75 (m, CH<sub>2</sub>, 5H), 2.06 (qt, J = 10.5, 3.6 Hz, CH, 1H), 5.27 (d, J = 13.9 Hz, CH=C, 1H), 6.18 (dd, J = 13.9, 10.1 Hz, CHSi, 1H). <sup>13</sup>C NMR (CDCl<sub>3</sub>, 100.61 MHz): 155.76 (CH=C), 122.60 (SiCH=C), 43.28 (CH), 33.02 (CH<sub>2</sub>), 25.85 (CH<sub>2</sub>), 25.70 (CH<sub>2</sub>), 7.42 (SiCH<sub>2</sub>), 4.71 (SiCH<sub>2</sub>CH<sub>3</sub>). <sup>29</sup>Si NMR (CDCl<sub>3</sub>, 79.5 MHz): δ -4.7 (Et<sub>3</sub>SiR).

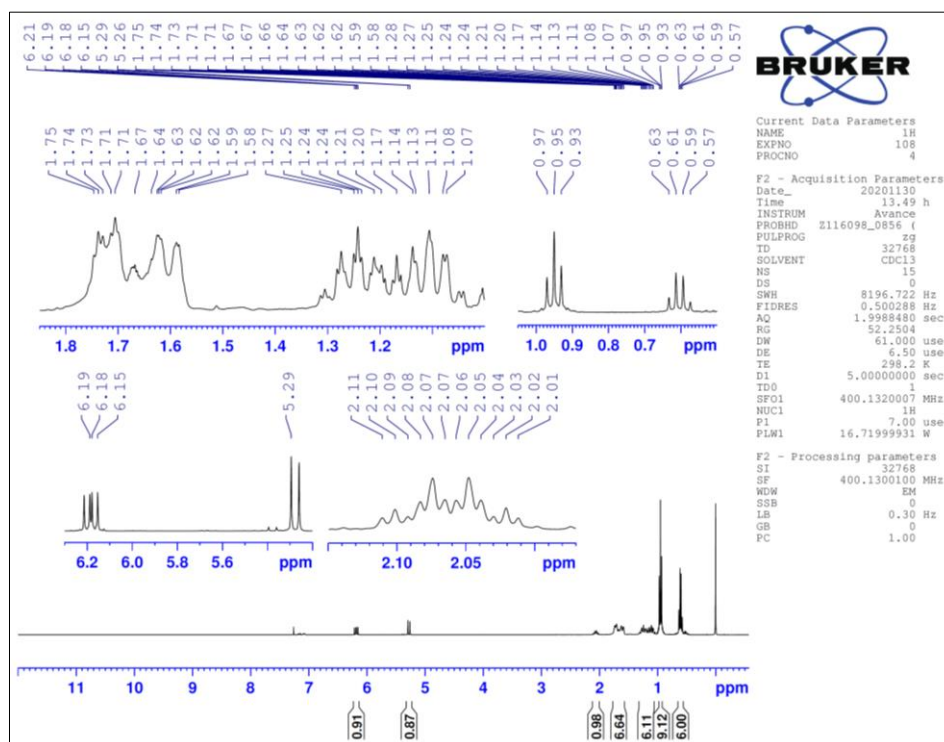

**Figure S49.** <sup>1</sup>H NMR spectrum of ethynylcyclohexane hydrosilylation product (Table S1, entry 15) (CDCl<sub>3</sub>, 400.13 MHz).

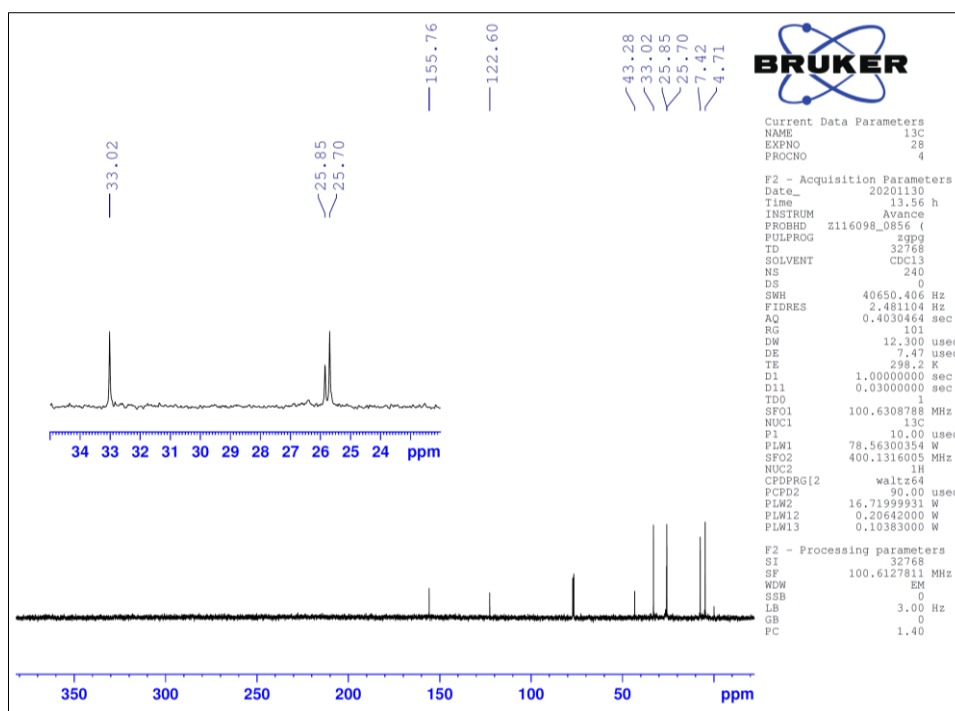

**Figure S50.**  $^{13}\text{C}$  NMR spectrum of ethynylcyclohexane hydrosilylation product (Table S1, entry 15) ( $\text{CDCl}_3$ , 100.61 MHz).

## DFT Computations

DFT calculations were performed using Gaussian 09.2.<sup>[3]</sup> Geometry optimization of all the molecules were carried out using the BP86-D3 method<sup>[4]</sup> with Ahlrichs' def2-SVP basis set,<sup>[5]</sup> and with the relativistic effect of zinc, which was accounted for by the Stuttgart-Dresden ECP,<sup>[6]</sup> implemented in the Gaussian 09 software. Thermal energy corrections were extracted from the results of frequency analysis performed at the same level of theory. Frequency analysis of all the molecules and intermediates contained no imaginary frequency showing that these are energy minima. The transition states geometries gave one imaginary frequency at expected reaction coordinates confirming that it is a first-order saddle point.

### Optimized geometries

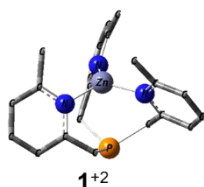

|    |          |          |          |
|----|----------|----------|----------|
| C  | 0.60224  | 2.37661  | -0.91068 |
| C  | 1.67084  | 2.30408  | 1.22841  |
| C  | 2.15955  | 4.12963  | -0.28833 |
| H  | 1.11836  | 4.04115  | -2.20592 |
| C  | 2.35107  | 3.50071  | 0.95268  |
| H  | 2.69328  | 5.06375  | -0.52365 |
| H  | 3.03381  | 3.92469  | 1.70327  |
| C  | -2.35783 | -0.66501 | -0.91522 |
| C  | -3.72502 | -0.66773 | -1.23717 |
| C  | -2.83494 | 0.29321  | 1.22436  |
| C  | -4.65642 | -0.19670 | -0.29673 |
| H  | -4.05460 | -1.05048 | -2.21424 |
| C  | -4.21092 | 0.28222  | 0.94593  |
| H  | -5.73178 | -0.20279 | -0.53424 |
| H  | -4.92167 | 0.65907  | 1.69565  |
| C  | 1.75863  | -1.70642 | -0.91198 |
| C  | 2.44700  | -2.88789 | -1.23329 |
| C  | 2.50227  | -3.93134 | -0.29425 |
| H  | 2.94693  | -2.97975 | -2.20872 |
| C  | 1.15978  | -2.60255 | 1.22365  |
| C  | 1.85954  | -3.78748 | 0.94603  |
| H  | 3.04709  | -4.85869 | -0.53097 |
| H  | 1.88638  | -4.59271 | 1.69450  |
| Zn | -0.00118 | -0.00072 | 0.54961  |
| N  | -1.95130 | -0.17900 | 0.29766  |
| N  | 1.12963  | -1.59960 | 0.29857  |
| N  | 0.81961  | 1.77797  | 0.30051  |
| P  | 0.00281  | 0.00292  | -2.64211 |
| C  | -1.30468 | -1.18873 | -1.85540 |
| H  | -0.75626 | -2.02227 | -1.36529 |
| H  | -1.80300 | -1.63357 | -2.73826 |
| C  | 1.68754  | -0.53158 | -1.85106 |
| H  | 2.13154  | 0.36061  | -1.35866 |
| H  | 2.32454  | -0.73900 | -2.73241 |
| C  | -0.37822 | 1.72897  | -1.85232 |
| H  | -0.51553 | 2.38490  | -2.73350 |
| H  | -1.37372 | 1.66749  | -1.36163 |



|   |          |          |          |
|---|----------|----------|----------|
| C | -2.24439 | 0.83491  | 2.49732  |
| H | -1.59716 | 0.07517  | 2.98785  |
| H | -1.62510 | 1.73335  | 2.27876  |
| H | -3.01936 | 1.13317  | 3.22701  |
| C | 0.38900  | -2.36514 | 2.49337  |
| H | 0.71955  | -1.42497 | 2.98690  |
| H | -0.69782 | -2.27939 | 2.26964  |
| H | 0.51605  | -3.18616 | 3.22255  |
| C | 1.84387  | 1.51830  | 2.49947  |
| H | 0.86172  | 1.33593  | 2.98826  |
| H | 2.31337  | 0.53366  | 2.27897  |
| H | 2.48834  | 2.03871  | 3.23147  |
| C | 1.28489  | 3.56199  | -1.22997 |

Sum of electronic and zero-point Energies= -1546.012948  
Sum of electronic and thermal Energies= -1545.987698  
Sum of electronic and thermal Enthalpies= -1545.986754  
Sum of electronic and thermal Free Energies= -1546.066650

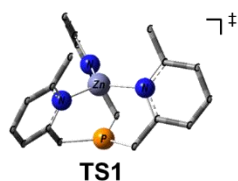

|    |          |          |          |
|----|----------|----------|----------|
| C  | -0.41247 | 2.56641  | -0.94913 |
| C  | -0.85919 | 3.88312  | -1.13495 |
| C  | -1.24674 | 2.54303  | 1.27653  |
| C  | -1.49754 | 4.54444  | -0.07193 |
| H  | -0.70337 | 4.38672  | -2.10063 |
| C  | -1.69554 | 3.86918  | 1.14098  |
| H  | -1.85033 | 5.58016  | -0.19613 |
| H  | -2.21163 | 4.35668  | 1.98100  |
| C  | -2.01559 | -1.63251 | -0.95779 |
| C  | -2.93714 | -2.67204 | -1.15213 |
| C  | -1.58982 | -2.35572 | 1.26605  |
| C  | -3.19870 | -3.55946 | -0.09435 |
| H  | -3.44821 | -2.78146 | -2.12023 |
| C  | -2.51886 | -3.40198 | 1.12193  |
| H  | -3.92239 | -4.37908 | -0.22515 |
| H  | -2.68967 | -4.09565 | 1.95814  |
| C  | 2.43060  | -0.92034 | -0.95530 |
| C  | 3.79412  | -1.18721 | -1.14847 |
| C  | 4.68923  | -0.97180 | -0.08674 |
| H  | 4.14934  | -1.56527 | -2.11866 |
| C  | 2.83308  | -0.20500 | 1.27534  |
| C  | 4.20609  | -0.47552 | 1.13251  |
| H  | 5.76274  | -1.17991 | -0.21657 |
| H  | 4.88861  | -0.27901 | 1.97226  |
| Zn | 0.00254  | -0.00218 | 0.22492  |
| N  | -1.36955 | -1.49160 | 0.23462  |
| N  | 1.97922  | -0.44327 | 0.23949  |
| N  | -0.60765 | 1.92934  | 0.24020  |
| P  | 0.00328  | 0.00587  | -2.23915 |
| C  | -1.74669 | -0.62197 | -2.06467 |
| H  | -2.10897 | -1.01903 | -3.03273 |
| H  | -2.32260 | 0.31291  | -1.87054 |
| C  | 1.42558  | -1.19195 | -2.06652 |
| H  | 1.95378  | -1.29913 | -3.03380 |
| H  | 0.90815  | -2.16196 | -1.88005 |
| C  | 0.32612  | 1.83680  | -2.06336 |
| H  | 1.42528  | 1.87851  | -1.88080 |
| H  | 0.14935  | 2.34914  | -3.02897 |
| C  | -1.47645 | 1.72447  | 2.51580  |
| H  | -2.14803 | 0.86921  | 2.28411  |
| H  | -0.51911 | 1.31550  | 2.90056  |
| H  | -1.94394 | 2.31404  | 3.32552  |
| C  | 2.24232  | 0.39174  | 2.52177  |
| H  | 1.84842  | 1.40820  | 2.30313  |

|   |          |          |         |
|---|----------|----------|---------|
| H | 1.40205  | -0.22946 | 2.89547 |
| H | 2.98571  | 0.48291  | 3.33468 |
| C | -0.77015 | -2.15575 | 2.50985 |
| H | 0.30694  | -2.30996 | 2.28127 |
| H | -0.89387 | -1.12483 | 2.90194 |
| H | -1.05137 | -2.86088 | 3.31324 |

Sum of electronic and zero-point Energies= -1545.996210  
Sum of electronic and thermal Energies= -1545.971125  
Sum of electronic and thermal Enthalpies= -1545.970181  
Sum of electronic and thermal Free Energies= -1546.050492

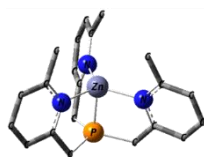

**INT1**

|    |          |          |          |
|----|----------|----------|----------|
| C  | -2.58554 | 0.55800  | -1.03952 |
| C  | -3.89855 | 1.01293  | -1.23616 |
| C  | -2.74400 | 0.99040  | 1.28853  |
| C  | -4.65221 | 1.44995  | -0.13588 |
| H  | -4.33037 | 1.01372  | -2.24835 |
| C  | -4.06931 | 1.43673  | 1.13771  |
| H  | -5.68594 | 1.80285  | -0.27461 |
| H  | -4.62984 | 1.78176  | 2.01892  |
| C  | 0.81379  | -2.51119 | -1.04163 |
| C  | 1.07830  | -3.87515 | -1.24041 |
| C  | 0.50507  | -2.87118 | 1.28371  |
| C  | 1.07076  | -4.74923 | -0.14253 |
| H  | 1.29963  | -4.24669 | -2.25234 |
| C  | 0.78241  | -4.24147 | 1.13074  |
| H  | 1.28364  | -5.82037 | -0.28286 |
| H  | 0.75863  | -4.90187 | 2.00997  |
| C  | 1.77574  | 1.96308  | -1.03367 |
| C  | 2.82975  | 2.86922  | -1.22775 |
| C  | 3.58959  | 3.29374  | -0.12684 |
| H  | 3.04549  | 3.24785  | -2.23824 |
| C  | 2.23548  | 1.86825  | 1.29269  |
| C  | 3.28844  | 2.78879  | 1.14463  |
| H  | 4.41492  | 4.00963  | -0.26358 |
| H  | 3.87173  | 3.09329  | 2.02600  |
| Zn | -0.00192 | 0.00168  | 0.31619  |
| N  | 0.53381  | -2.02863 | 0.20950  |
| N  | 1.49298  | 1.47735  | 0.21544  |
| N  | -2.02813 | 0.55193  | 0.21158  |
| P  | 0.00099  | 0.00632  | -1.95039 |
| C  | 0.89884  | -1.56841 | -2.25377 |
| H  | 1.96027  | -1.26693 | -2.40658 |
| H  | 0.58971  | -2.09583 | -3.17872 |
| C  | 0.91724  | 1.57156  | -2.24795 |
| H  | 0.12537  | 2.34079  | -2.39706 |
| H  | 1.52856  | 1.57185  | -3.17290 |
| C  | -1.81164 | 0.01919  | -2.25445 |
| H  | -2.11260 | 0.55641  | -3.17644 |
| H  | -2.08279 | -1.04947 | -2.41341 |
| C  | 0.11322  | -2.28793 | 2.61232  |
| H  | 0.57162  | -1.28842 | 2.76059  |
| H  | -0.99181 | -2.17652 | 2.66744  |
| H  | 0.42214  | -2.93128 | 3.45759  |
| C  | 1.91739  | 1.23541  | 2.61826  |
| H  | 0.82104  | 1.14140  | 2.76219  |
| H  | 2.36502  | 0.21880  | 2.67087  |
| H  | 2.32235  | 1.81831  | 3.46670  |
| C  | -2.04387 | 1.02920  | 2.61788  |
| H  | -1.39520 | 0.13937  | 2.75406  |
| H  | -1.40784 | 1.93878  | 2.68662  |

H -2.75682 1.06154 3.46325

Sum of electronic and zero-point Energies= -1546.003018  
 Sum of electronic and thermal Energies= -1545.977333  
 Sum of electronic and thermal Enthalpies= -1545.976389  
 Sum of electronic and thermal Free Energies= -1546.058558

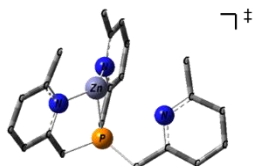

TS2

|    |          |          |          |
|----|----------|----------|----------|
| C  | -1.23265 | 1.12052  | 1.64129  |
| C  | -2.31716 | 1.78981  | 2.22751  |
| C  | -0.94400 | 2.89667  | 0.07196  |
| C  | -2.71150 | 3.03968  | 1.72380  |
| H  | -2.84489 | 1.33458  | 3.07885  |
| C  | -2.01629 | 3.60157  | 0.64197  |
| H  | -3.56262 | 3.57383  | 2.17432  |
| H  | -2.30434 | 4.57976  | 0.23022  |
| C  | 2.98573  | -1.05393 | 0.66722  |
| C  | 4.29853  | -1.54642 | 0.73435  |
| C  | 3.61188  | 0.44751  | -1.08175 |
| C  | 5.27977  | -1.02440 | -0.12311 |
| H  | 4.54737  | -2.33691 | 1.45845  |
| C  | 4.93475  | -0.01910 | -1.04004 |
| H  | 6.31141  | -1.40727 | -0.08070 |
| H  | 5.68322  | 0.40073  | -1.72773 |
| C  | -1.96772 | -2.38849 | -0.17274 |
| C  | -3.02581 | -3.28283 | -0.41238 |
| C  | -4.08742 | -2.84243 | -1.21958 |
| H  | -3.01526 | -4.29876 | 0.01087  |
| C  | -2.97350 | -0.69543 | -1.43888 |
| C  | -4.06267 | -1.53859 | -1.74075 |
| H  | -4.93067 | -3.51459 | -1.44189 |
| H  | -4.88467 | -1.17287 | -2.37428 |
| Zn | 0.70823  | 0.44260  | -0.31686 |
| N  | 2.67479  | -0.07025 | -0.23314 |
| N  | -1.95124 | -1.13324 | -0.66718 |
| N  | -0.57967 | 1.68344  | 0.57989  |
| P  | 0.19481  | -1.28277 | 1.04754  |
| C  | 1.92746  | -1.59997 | 1.64535  |
| H  | 2.11106  | -2.67818 | 1.82868  |
| H  | 2.05849  | -1.09512 | 2.62786  |
| C  | -0.75942 | -2.80106 | 0.66644  |
| H  | -1.05523 | -3.33158 | 1.59666  |
| H  | -0.08142 | -3.47956 | 0.10164  |
| C  | -0.74006 | -0.19978 | 2.24220  |
| H  | -1.59702 | -0.75640 | 2.67211  |
| H  | -0.05887 | 0.03264  | 3.09045  |
| C  | 3.13776  | 1.51333  | -2.02993 |
| H  | 2.26914  | 1.15000  | -2.62551 |
| H  | 2.82367  | 2.41864  | -1.46733 |
| H  | 3.92131  | 1.81858  | -2.74799 |
| C  | -0.14370 | 3.41742  | -1.08781 |
| H  | 0.86257  | 3.74285  | -0.74602 |
| H  | -0.00923 | 2.63206  | -1.86588 |
| H  | -0.62861 | 4.28307  | -1.57620 |
| C  | -2.89359 | 0.72975  | -1.92427 |
| H  | -3.10144 | 1.43383  | -1.08984 |
| H  | -1.87363 | 0.95276  | -2.30315 |
| H  | -3.61890 | 0.93897  | -2.73293 |

Sum of electronic and zero-point Energies= -1545.982357  
 Sum of electronic and thermal Energies= -1545.957087  
 Sum of electronic and thermal Enthalpies= -1545.956143  
 Sum of electronic and thermal Free Energies= -1546.038291

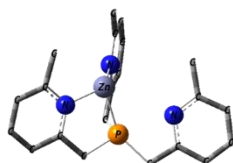

**INT2**

|    |          |          |          |
|----|----------|----------|----------|
| C  | -0.76339 | 1.03478  | 1.46205  |
| C  | -1.63443 | 1.77308  | 2.27470  |
| C  | -0.40300 | 2.93326  | 0.05537  |
| C  | -1.87112 | 3.12564  | 1.97752  |
| H  | -2.11761 | 1.29093  | 3.13722  |
| C  | -1.25616 | 3.70845  | 0.85982  |
| H  | -2.54747 | 3.72060  | 2.61092  |
| H  | -1.44034 | 4.76053  | 0.59727  |
| C  | 2.82723  | -1.57363 | 0.36973  |
| C  | 4.08270  | -2.09007 | 0.73179  |
| C  | 3.87920  | 0.29759  | -0.68505 |
| C  | 5.24826  | -1.40126 | 0.36553  |
| H  | 4.13916  | -3.03678 | 1.29008  |
| C  | 5.14759  | -0.19842 | -0.35380 |
| H  | 6.23674  | -1.80351 | 0.63728  |
| H  | 6.04699  | 0.35775  | -0.65568 |
| C  | -2.61894 | -2.14754 | -0.19431 |
| C  | -3.83101 | -2.84269 | -0.33392 |
| C  | -4.95560 | -2.10912 | -0.74651 |
| H  | -3.89297 | -3.92367 | -0.13796 |
| C  | -3.57221 | -0.10952 | -0.83284 |
| C  | -4.82460 | -0.73559 | -1.00679 |
| H  | -5.92795 | -2.60925 | -0.87545 |
| H  | -5.68985 | -0.14694 | -1.34716 |
| Zn | 0.91947  | 0.33520  | -0.66547 |
| N  | 2.75684  | -0.39337 | -0.31848 |
| N  | -2.49754 | -0.82222 | -0.41829 |
| N  | -0.16315 | 1.63274  | 0.38681  |
| P  | -0.04572 | -1.49698 | 0.31397  |
| C  | 1.56082  | -2.36026 | 0.71846  |
| H  | 1.56886  | -3.30107 | 0.12317  |
| H  | 1.60288  | -2.67912 | 1.78197  |
| C  | -1.31901 | -2.82421 | 0.19208  |
| H  | -1.37264 | -3.36850 | 1.16107  |
| H  | -0.97948 | -3.55417 | -0.57603 |
| C  | -0.39516 | -0.40306 | 1.80298  |
| H  | -1.18948 | -0.86080 | 2.42539  |
| H  | 0.53292  | -0.39706 | 2.41828  |
| C  | 3.65240  | 1.58393  | -1.42880 |
| H  | 3.04287  | 1.40698  | -2.34365 |
| H  | 3.11565  | 2.31178  | -0.78107 |
| H  | 4.59763  | 2.05884  | -1.75085 |
| C  | 0.28272  | 3.48984  | -1.16032 |
| H  | 1.24557  | 3.97263  | -0.88570 |
| H  | 0.49588  | 2.69729  | -1.91288 |
| H  | -0.33628 | 4.25940  | -1.66095 |
| C  | -3.36705 | 1.36152  | -1.08697 |
| H  | -3.29691 | 1.91438  | -0.12675 |
| H  | -2.42103 | 1.53186  | -1.64063 |
| H  | -4.19997 | 1.80035  | -1.66780 |

Sum of electronic and zero-point Energies= -1545.983943  
 Sum of electronic and thermal Energies= -1545.958020  
 Sum of electronic and thermal Enthalpies= -1545.957076  
 Sum of electronic and thermal Free Energies= -1546.040212

**Me<sub>3</sub>SiH**

|    |          |         |          |
|----|----------|---------|----------|
| Si | 0.00009  | 0.00007 | -0.38589 |
| H  | 0.00045  | 0.00011 | -1.89615 |
| C  | -1.66526 | 0.66888 | 0.22628  |
| H  | -1.69867 | 0.67930 | 1.33688  |
| H  | -1.83798 | 1.70682 | -0.12882 |

|   |          |          |          |
|---|----------|----------|----------|
| H | -2.50785 | 0.04128  | -0.13327 |
| C | 1.41195  | 1.10749  | 0.22642  |
| H | 1.43955  | 1.12817  | 1.33700  |
| H | 2.39679  | 0.73966  | -0.13142 |
| H | 1.28816  | 2.15173  | -0.13043 |
| C | 0.25321  | -1.77641 | 0.22630  |
| H | -0.55794 | -2.44503 | -0.13166 |
| H | 1.21931  | -2.19158 | -0.13063 |
| H | 0.25752  | -1.81120 | 1.33698  |

Sum of electronic and zero-point Energies= -409.591024  
 Sum of electronic and thermal Energies= -409.583383  
 Sum of electronic and thermal Enthalpies= -409.582439  
 Sum of electronic and thermal Free Energies= -409.621371

#### H<sub>2</sub>C=CH<sub>2</sub>

|   |          |          |         |
|---|----------|----------|---------|
| C | 0.00000  | 0.67122  | 0.00000 |
| H | 0.93861  | 1.25181  | 0.00000 |
| H | -0.93855 | 1.25188  | 0.00000 |
| C | 0.00000  | -0.67122 | 0.00000 |
| H | -0.93861 | -1.25181 | 0.00000 |
| H | 0.93855  | -1.25188 | 0.00000 |

Sum of electronic and zero-point Energies= -78.476182  
 Sum of electronic and thermal Energies= -78.473102  
 Sum of electronic and thermal Enthalpies= -78.472158  
 Sum of electronic and thermal Free Energies= -78.497755

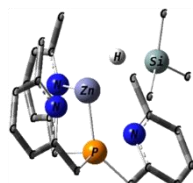

#### INT2-H-SiMe<sub>3</sub>

|   |          |          |          |
|---|----------|----------|----------|
| C | -0.82262 | 2.21106  | 0.79915  |
| C | -1.66033 | 3.32928  | 0.91474  |
| C | -0.45377 | 2.66539  | -1.50240 |
| C | -1.88083 | 4.14374  | -0.20693 |
| H | -2.12700 | 3.56376  | 1.88265  |
| C | -1.26937 | 3.81016  | -1.42132 |
| H | -2.53086 | 5.02932  | -0.13294 |
| H | -1.42726 | 4.42401  | -2.32026 |
| C | 2.64398  | -0.27672 | 1.87548  |
| C | 3.86884  | -0.21897 | 2.56223  |
| C | 3.68215  | 0.50657  | -0.11222 |
| C | 5.02265  | 0.19721  | 1.88324  |
| H | 3.91221  | -0.51086 | 3.62225  |
| C | 4.92925  | 0.55919  | 0.53055  |
| H | 5.99068  | 0.24000  | 2.40618  |
| H | 5.81668  | 0.89053  | -0.02819 |
| C | -2.74156 | -1.25798 | 1.59692  |
| C | -3.95870 | -1.90176 | 1.87896  |
| C | -5.03471 | -1.67103 | 1.00609  |
| H | -4.06111 | -2.56669 | 2.74978  |
| C | -3.60436 | -0.21216 | -0.31120 |
| C | -4.85620 | -0.82690 | -0.10270 |
| H | -6.00767 | -2.15451 | 1.18488  |
| H | -5.68366 | -0.64375 | -0.80463 |
| N | 2.56809  | 0.09333  | 0.56273  |
| N | -2.57830 | -0.43013 | 0.54477  |
| N | -0.23678 | 1.89473  | -0.39691 |
| P | -0.16264 | -0.41855 | 1.66920  |
| C | 1.40273  | -0.79585 | 2.59571  |
| H | 1.47086  | -1.90511 | 2.66692  |
| H | 1.38405  | -0.42486 | 3.64205  |
| C | -1.48760 | -1.45239 | 2.42998  |
| H | -1.62591 | -1.16154 | 3.49459  |

|    |          |          |          |
|----|----------|----------|----------|
| H  | -1.14478 | -2.51066 | 2.42766  |
| C  | -0.48342 | 1.38475  | 2.02765  |
| H  | -1.27094 | 1.49468  | 2.79909  |
| H  | 0.45775  | 1.78387  | 2.46822  |
| C  | 3.49272  | 0.90210  | -1.55059 |
| H  | 3.09811  | 0.05077  | -2.14594 |
| H  | 2.76018  | 1.73334  | -1.62532 |
| H  | 4.43568  | 1.23733  | -2.01960 |
| C  | 0.20198  | 2.28698  | -2.80232 |
| H  | 1.14049  | 2.86450  | -2.94863 |
| H  | 0.45280  | 1.20902  | -2.84922 |
| H  | -0.45521 | 2.52315  | -3.66177 |
| C  | -3.33377 | 0.70483  | -1.47577 |
| H  | -3.24048 | 1.75515  | -1.12814 |
| H  | -2.37289 | 0.43563  | -1.96147 |
| H  | -4.14012 | 0.66661  | -2.23196 |
| Zn | 0.71353  | 0.07468  | -0.39786 |
| Si | 0.62099  | -2.36000 | -2.04243 |
| C  | 1.36678  | -2.51597 | -3.75050 |
| H  | 2.41866  | -2.16512 | -3.77742 |
| H  | 1.36440  | -3.58983 | -4.03978 |
| H  | 0.78075  | -1.96131 | -4.51116 |
| C  | 1.68575  | -3.06824 | -0.66506 |
| H  | 1.82376  | -4.15831 | -0.82725 |
| H  | 2.68949  | -2.59730 | -0.64155 |
| H  | 1.20852  | -2.93165 | 0.32629  |
| C  | -1.20706 | -2.71830 | -1.88154 |
| H  | -1.59550 | -2.36083 | -0.90614 |
| H  | -1.78850 | -2.23057 | -2.69025 |
| H  | -1.38132 | -3.81327 | -1.95007 |
| H  | 0.70175  | -0.75299 | -1.86006 |

Sum of electronic and zero-point Energies= -1955.637108  
Sum of electronic and thermal Energies= -1955.602165  
Sum of electronic and thermal Enthalpies= -1955.601221  
Sum of electronic and thermal Free Energies= -1955.704109

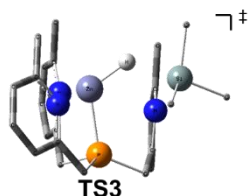

|   |          |          |          |
|---|----------|----------|----------|
| C | -0.62491 | -2.27069 | -0.75889 |
| C | -1.62854 | -3.23450 | -0.93041 |
| C | -0.87410 | -2.34931 | 1.59659  |
| C | -2.27136 | -3.76304 | 0.20085  |
| H | -1.89619 | -3.57416 | -1.94174 |
| C | -1.88588 | -3.32235 | 1.47221  |
| H | -3.06270 | -4.52031 | 0.08797  |
| H | -2.36015 | -3.72876 | 2.37770  |
| C | 3.22720  | 0.06801  | -1.23353 |
| C | 4.58031  | -0.07455 | -1.58055 |
| C | 3.72594  | -0.34839 | 1.04875  |
| C | 5.52340  | -0.34645 | -0.57765 |
| H | 4.89171  | 0.03998  | -2.62972 |
| C | 5.09334  | -0.47917 | 0.75031  |
| H | 6.58925  | -0.45305 | -0.83246 |
| H | 5.80948  | -0.69030 | 1.55778  |
| C | -2.07703 | 0.69869  | -1.66654 |
| C | -3.10946 | -0.02356 | -2.28694 |
| C | -4.14474 | -0.55673 | -1.50446 |
| H | -3.08994 | -0.17462 | -3.37658 |
| C | -3.05292 | 0.38667  | 0.45554  |
| C | -4.09194 | -0.37726 | -0.11994 |
| H | -4.96825 | -1.11982 | -1.96999 |
| H | -4.86437 | -0.80819 | 0.53377  |
| N | 2.82011  | -0.08167 | 0.06273  |
| N | -2.07222 | 0.93357  | -0.31720 |

|    |          |          |          |
|----|----------|----------|----------|
| N  | -0.27547 | -1.82870 | 0.48748  |
| P  | 0.50928  | 0.08083  | -1.74169 |
| C  | 2.21597  | 0.44329  | -2.32599 |
| H  | 2.25807  | 1.54269  | -2.49592 |
| H  | 2.48121  | -0.03830 | -3.28928 |
| C  | -0.85696 | 1.09094  | -2.48048 |
| H  | -1.01015 | 0.89875  | -3.56033 |
| H  | -0.58485 | 2.15756  | -2.35216 |
| C  | 0.13604  | -1.72316 | -1.96165 |
| H  | -0.39137 | -1.94907 | -2.90950 |
| H  | 1.13059  | -2.22096 | -2.01484 |
| C  | 3.17787  | -0.50643 | 2.43999  |
| H  | 2.57912  | 0.38506  | 2.72824  |
| H  | 2.51018  | -1.39326 | 2.48807  |
| H  | 3.97623  | -0.64293 | 3.19237  |
| C  | -0.39816 | -1.89177 | 2.94856  |
| H  | 0.47948  | -2.49664 | 3.26498  |
| H  | -0.08645 | -0.82678 | 2.94123  |
| H  | -1.17821 | -2.02301 | 3.72215  |
| C  | -3.02540 | 0.61971  | 1.94032  |
| H  | -3.71460 | -0.06914 | 2.46291  |
| H  | -2.00655 | 0.47978  | 2.34899  |
| H  | -3.35246 | 1.65276  | 2.18375  |
| Zn | 0.76327  | 0.01710  | 0.55185  |
| Si | -0.83751 | 2.73322  | 0.71630  |
| C  | -0.73146 | 3.19157  | 2.54725  |
| H  | 0.26437  | 2.93394  | 2.96023  |
| H  | -0.87305 | 4.29376  | 2.60489  |
| H  | -1.50647 | 2.72867  | 3.18661  |
| C  | 0.75279  | 3.25103  | -0.16931 |
| H  | 0.86441  | 4.32981  | 0.08147  |
| H  | 1.65270  | 2.72219  | 0.20344  |
| H  | 0.72364  | 3.19608  | -1.27393 |
| C  | -2.27142 | 3.72170  | -0.01960 |
| H  | -2.37200 | 3.60249  | -1.11691 |
| H  | -3.24774 | 3.47552  | 0.44490  |
| H  | -2.06287 | 4.79375  | 0.19309  |
| H  | -0.03265 | 1.11811  | 1.40285  |

Sum of electronic and zero-point Energies= -1955.601008  
Sum of electronic and thermal Energies= -1955.567631  
Sum of electronic and thermal Enthalpies= -1955.566687  
Sum of electronic and thermal Free Energies= -1955.663587

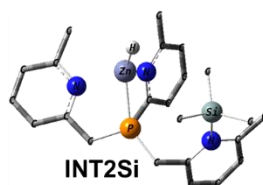

|   |          |          |          |
|---|----------|----------|----------|
| C | -0.16251 | 1.20179  | -1.52103 |
| C | 0.61915  | 1.96853  | -2.39841 |
| C | -0.32368 | 2.99828  | 0.01250  |
| C | 0.92526  | 3.29542  | -2.05382 |
| H | 0.96245  | 1.53522  | -3.34949 |
| C | 0.44587  | 3.81302  | -0.84414 |
| H | 1.52609  | 3.92338  | -2.73009 |
| H | 0.66167  | 4.85090  | -0.55092 |
| C | -3.22783 | -1.69866 | -0.40462 |
| C | -4.42489 | -2.26680 | -0.86765 |
| C | -4.35195 | 0.26284  | 0.28590  |
| C | -5.61962 | -1.54451 | -0.72643 |
| H | -4.41851 | -3.26721 | -1.32558 |
| C | -5.58070 | -0.26892 | -0.14728 |
| H | -6.57324 | -1.97251 | -1.07217 |
| H | -6.49853 | 0.32607  | -0.03289 |
| C | 2.24208  | -1.61549 | -0.99469 |
| C | 2.62123  | -1.66615 | -2.34619 |
| C | 3.68109  | -0.88649 | -2.82213 |
| H | 2.07468  | -2.33686 | -3.02494 |

|    |          |          |          |
|----|----------|----------|----------|
| C  | 3.95299  | -0.00714 | -0.56563 |
| C  | 4.32610  | -0.03777 | -1.92246 |
| H  | 3.99028  | -0.93559 | -3.87770 |
| H  | 5.14971  | 0.61156  | -2.25372 |
| N  | -3.19974 | -0.45882 | 0.16070  |
| N  | -0.60690 | 1.70850  | -0.33441 |
| P  | -0.48691 | -1.30720 | -0.36297 |
| C  | -1.92042 | -2.46818 | -0.52312 |
| H  | -1.82947 | -3.20072 | 0.31115  |
| H  | -1.88943 | -3.04971 | -1.46839 |
| C  | 1.02145  | -2.40365 | -0.59966 |
| H  | 0.79202  | -3.12733 | -1.40634 |
| H  | 1.15224  | -2.98397 | 0.33113  |
| C  | -0.57727 | -0.21451 | -1.87260 |
| H  | 0.00178  | -0.60861 | -2.73052 |
| H  | -1.64876 | -0.21154 | -2.17112 |
| C  | -4.24075 | 1.63649  | 0.88575  |
| H  | -3.83006 | 1.58101  | 1.91743  |
| H  | -3.54989 | 2.25907  | 0.27783  |
| H  | -5.21873 | 2.14960  | 0.92863  |
| C  | -0.83409 | 3.50482  | 1.33206  |
| H  | -1.93037 | 3.36340  | 1.41457  |
| H  | -0.38396 | 2.93348  | 2.17016  |
| H  | -0.60810 | 4.57757  | 1.47207  |
| C  | 4.73009  | 0.90765  | 0.34207  |
| H  | 4.15104  | 1.30643  | 1.19136  |
| H  | 5.62135  | 0.38371  | 0.74649  |
| H  | 5.10552  | 1.76943  | -0.24201 |
| Zn | -1.43102 | 0.36288  | 1.13428  |
| H  | -1.41321 | 0.56657  | 2.65674  |
| Si | 2.62226  | -0.77854 | 1.85985  |
| N  | 2.92847  | -0.81442 | -0.09735 |
| C  | 4.29861  | -1.17925 | 2.61277  |
| H  | 4.88379  | -0.28734 | 2.90731  |
| H  | 4.11430  | -1.77301 | 3.53288  |
| H  | 4.92306  | -1.80815 | 1.94464  |
| C  | 1.90072  | 0.93816  | 2.14554  |
| H  | 1.71522  | 1.47381  | 1.19295  |
| H  | 0.92218  | 0.82654  | 2.65779  |
| H  | 2.55483  | 1.56642  | 2.78441  |
| C  | 1.42785  | -2.08380 | 2.48797  |
| H  | 0.37183  | -1.94002 | 2.18806  |
| H  | 1.75394  | -3.13147 | 2.32938  |
| H  | 1.46165  | -1.91008 | 3.58832  |

Sum of electronic and zero-point Energies= -1955.626684  
Sum of electronic and thermal Energies= -1955.592567  
Sum of electronic and thermal Enthalpies= -1955.591623  
Sum of electronic and thermal Free Energies= -1955.691228

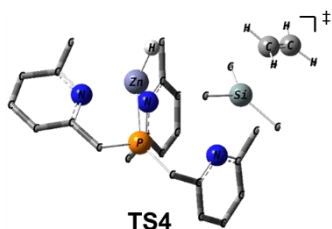

|   |          |          |          |
|---|----------|----------|----------|
| C | 0.57953  | -1.99911 | 0.69061  |
| C | -0.06870 | -3.15659 | 1.14698  |
| C | 0.32332  | -0.94477 | 2.79298  |
| C | -0.53184 | -3.19925 | 2.47085  |
| H | -0.20069 | -4.01339 | 0.47068  |
| C | -0.32684 | -2.08887 | 3.29990  |
| H | -1.04328 | -4.09559 | 2.85459  |
| H | -0.66476 | -2.09782 | 4.34662  |
| C | 3.49036  | 0.33999  | -1.57978 |
| C | 4.79104  | 0.24423  | -2.09998 |
| C | 4.32679  | 0.80089  | 0.58417  |



|    |          |          |          |
|----|----------|----------|----------|
| C  | 5.88392  | 0.45351  | -1.24552 |
| H  | 4.94109  | 0.01373  | -3.16530 |
| C  | 5.64905  | 0.73200  | 0.10809  |
| H  | 6.91277  | 0.39229  | -1.63267 |
| H  | 6.48546  | 0.88924  | 0.80472  |
| C  | -1.66257 | -1.39966 | -1.94875 |
| C  | -1.95466 | -2.67613 | -2.46755 |
| C  | -2.82421 | -3.51531 | -1.75686 |
| H  | -1.50743 | -3.00194 | -3.41873 |
| C  | -3.00200 | -1.77092 | -0.06967 |
| C  | -3.33660 | -3.06092 | -0.53650 |
| H  | -3.08594 | -4.51253 | -2.14335 |
| H  | -4.00047 | -3.69991 | 0.06460  |
| N  | 3.27274  | 0.61453  | -0.26225 |
| N  | 0.74757  | -0.90935 | 1.49544  |
| P  | 0.78989  | -0.25788 | -1.47044 |
| C  | 2.28531  | 0.13372  | -2.48743 |
| H  | 2.05710  | 1.07330  | -3.03985 |
| H  | 2.49758  | -0.64415 | -3.25053 |
| C  | -0.63120 | -0.53859 | -2.64485 |
| H  | -0.25989 | -1.03094 | -3.56566 |
| H  | -1.03574 | 0.45235  | -2.93505 |
| C  | 1.15091  | -1.92188 | -0.71008 |
| H  | 0.79952  | -2.76101 | -1.34146 |
| H  | 2.25922  | -1.98587 | -0.64740 |
| C  | 4.00404  | 1.05677  | 2.02986  |
| H  | 3.36406  | 1.95932  | 2.13560  |
| H  | 3.43881  | 0.19559  | 2.44591  |
| H  | 4.91491  | 1.19982  | 2.63944  |
| C  | 0.58778  | 0.25310  | 3.66325  |
| H  | 1.66547  | 0.30180  | 3.92826  |
| H  | 0.34861  | 1.19945  | 3.13764  |
| H  | 0.01470  | 0.20448  | 4.60756  |
| C  | -3.51537 | -1.31435 | 1.27140  |
| H  | -4.14429 | -2.09138 | 1.74395  |
| H  | -2.67003 | -1.09797 | 1.95527  |
| H  | -4.12918 | -0.39610 | 1.18797  |
| N  | -2.19415 | -0.93978 | -0.78451 |
| Zn | 1.28202  | 0.96328  | 0.54292  |
| H  | 0.89440  | 2.35111  | 1.09092  |
| C  | -3.52786 | 4.51800  | -0.09679 |
| H  | -2.59542 | 5.01698  | 0.21721  |
| H  | -3.82906 | 4.64680  | -1.15119 |
| C  | -4.32671 | 3.89283  | 0.80623  |
| H  | -4.06051 | 3.85338  | 1.87570  |
| H  | -5.30727 | 3.47442  | 0.52314  |
| Si | -2.74792 | 1.96281  | -0.31155 |
| C  | -1.42003 | 2.67984  | -1.41648 |
| H  | -0.56155 | 1.97596  | -1.39251 |
| H  | -1.76178 | 2.84093  | -2.45763 |
| H  | -1.02615 | 3.63010  | -1.00582 |
| C  | -2.17597 | 1.67010  | 1.43900  |
| H  | -1.60077 | 2.55814  | 1.77043  |
| H  | -2.99286 | 1.45897  | 2.15340  |
| H  | -1.47642 | 0.81080  | 1.41662  |
| C  | -4.32231 | 1.36611  | -1.12595 |
| H  | -4.76656 | 2.18928  | -1.72302 |
| H  | -4.08944 | 0.53186  | -1.81720 |
| H  | -5.07650 | 1.01252  | -0.39560 |

|                                              |              |
|----------------------------------------------|--------------|
| Sum of electronic and zero-point Energies=   | -2034.092220 |
| Sum of electronic and thermal Energies=      | -2034.054400 |
| Sum of electronic and thermal Enthalpies=    | -2034.053456 |
| Sum of electronic and thermal Free Energies= | -2034.161966 |

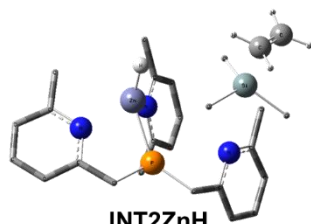

INT2ZnH

|    |          |          |          |
|----|----------|----------|----------|
| C  | 1.01104  | -2.08545 | 0.59820  |
| C  | 0.82377  | -3.36417 | 1.14583  |
| C  | 0.86914  | -1.08727 | 2.73664  |
| C  | 0.66423  | -3.50093 | 2.53255  |
| H  | 0.81142  | -4.24421 | 0.48617  |
| C  | 0.68433  | -2.35251 | 3.33135  |
| H  | 0.52153  | -4.49515 | 2.98364  |
| H  | 0.55910  | -2.42101 | 4.42228  |
| C  | 3.29635  | 0.53811  | -1.79445 |
| C  | 4.57784  | 0.51496  | -2.36928 |
| C  | 4.19515  | 1.06907  | 0.32756  |
| C  | 5.69160  | 0.79598  | -1.56417 |
| H  | 4.69559  | 0.28457  | -3.43863 |
| C  | 5.49795  | 1.07441  | -0.20395 |
| H  | 6.70508  | 0.79120  | -1.99428 |
| H  | 6.35201  | 1.28880  | 0.45501  |
| C  | -1.89010 | -1.28809 | -2.08840 |
| C  | -3.01101 | -1.73138 | -2.81508 |
| C  | -4.05118 | -2.36209 | -2.11087 |
| H  | -3.06059 | -1.60212 | -3.90706 |
| C  | -2.77696 | -2.05443 | -0.06344 |
| C  | -3.93086 | -2.53271 | -0.72405 |
| H  | -4.94189 | -2.72933 | -2.64410 |
| H  | -4.71884 | -3.04499 | -0.15070 |
| N  | 3.12025  | 0.81010  | -0.47102 |
| N  | 1.03252  | -0.96963 | 1.38634  |
| P  | 0.65619  | -0.30641 | -1.56357 |
| C  | 2.06508  | 0.25691  | -2.63895 |
| H  | 1.73042  | 1.19091  | -3.14465 |
| H  | 2.30153  | -0.47289 | -3.44130 |
| C  | -0.69317 | -0.66650 | -2.78231 |
| H  | -0.30095 | -1.34200 | -3.57464 |
| H  | -0.95576 | 0.28621  | -3.29380 |
| C  | 1.26141  | -1.93492 | -0.88914 |
| H  | 0.82306  | -2.78465 | -1.44810 |
| H  | 2.35951  | -1.96083 | -1.06816 |
| C  | 3.92047  | 1.31794  | 1.78444  |
| H  | 3.19677  | 2.15137  | 1.90985  |
| H  | 3.46599  | 0.41323  | 2.24033  |
| H  | 4.84180  | 1.56304  | 2.34376  |
| C  | 0.91204  | 0.14676  | 3.59967  |
| H  | 1.87384  | 0.19513  | 4.15411  |
| H  | 0.81448  | 1.07628  | 3.00763  |
| H  | 0.10873  | 0.11952  | 4.36283  |
| C  | -2.59780 | -2.25271 | 1.42101  |
| H  | -2.55823 | -3.33491 | 1.66540  |
| H  | -1.65771 | -1.79187 | 1.77333  |
| H  | -3.44951 | -1.83024 | 1.99377  |
| N  | -1.78843 | -1.42873 | -0.74651 |
| Zn | 1.13805  | 0.95248  | 0.40546  |
| H  | 0.66808  | 2.29176  | 1.01694  |
| C  | -3.84377 | 4.26194  | 0.51776  |
| H  | -2.97421 | 4.93957  | 0.46771  |
| H  | -4.52686 | 4.26181  | -0.35041 |
| C  | -4.12874 | 3.55408  | 1.65097  |
| H  | -3.50151 | 3.64359  | 2.55429  |
| H  | -5.05584 | 2.96028  | 1.74245  |
| Si | -2.95983 | 2.02680  | 0.19954  |
| C  | -1.74116 | 2.75932  | -1.01198 |
| H  | -1.14587 | 1.88751  | -1.36522 |
| H  | -2.22795 | 3.24737  | -1.87870 |
| H  | -1.02055 | 3.44523  | -0.52598 |

|                                              |          |         |          |              |
|----------------------------------------------|----------|---------|----------|--------------|
| C                                            | -2.17707 | 1.23129 | 1.69205  |              |
| H                                            | -1.46162 | 1.91172 | 2.19180  |              |
| H                                            | -2.91700 | 0.83408 | 2.41314  |              |
| H                                            | -1.58808 | 0.38328 | 1.27620  |              |
| C                                            | -4.41927 | 1.15809 | -0.56405 |              |
| H                                            | -4.98789 | 1.81206 | -1.25563 |              |
| H                                            | -4.02088 | 0.31076 | -1.16406 |              |
| H                                            | -5.11008 | 0.73519 | 0.19203  |              |
| Sum of electronic and zero-point Energies=   |          |         |          | -2034.097457 |
| Sum of electronic and thermal Energies=      |          |         |          | -2034.058517 |
| Sum of electronic and thermal Enthalpies=    |          |         |          | -2034.057573 |
| Sum of electronic and thermal Free Energies= |          |         |          | -2034.169592 |

#### Me<sub>3</sub>Si(H)<sub>2</sub>C-CH<sub>3</sub>

|                                              |          |          |          |             |
|----------------------------------------------|----------|----------|----------|-------------|
| Si                                           | -0.42426 | -0.00125 | 0.00000  |             |
| C                                            | -0.53004 | 1.09099  | 1.54861  |             |
| H                                            | -1.49391 | 1.64198  | 1.58343  |             |
| H                                            | -0.45394 | 0.48091  | 2.47386  |             |
| H                                            | 0.28790  | 1.84204  | 1.56853  |             |
| C                                            | -1.85572 | -1.24661 | -0.00009 |             |
| H                                            | -2.83792 | -0.72770 | 0.00010  |             |
| H                                            | -1.81781 | -1.89989 | -0.89775 |             |
| H                                            | -1.81763 | -1.90021 | 0.89733  |             |
| C                                            | -0.53071 | 1.09199  | -1.54786 |             |
| H                                            | 0.28721  | 1.84309  | -1.56766 |             |
| H                                            | -0.45494 | 0.48251  | -2.47353 |             |
| H                                            | -1.49462 | 1.64296  | -1.58197 |             |
| C                                            | 1.22522  | -0.95643 | -0.00068 |             |
| H                                            | 1.22353  | -1.63219 | 0.88534  |             |
| H                                            | 1.22353  | -1.63084 | -0.88772 |             |
| C                                            | 2.49126  | -0.07973 | -0.00005 |             |
| H                                            | 2.53315  | 0.57935  | 0.89355  |             |
| H                                            | 3.42211  | -0.68690 | -0.00074 |             |
| H                                            | 2.53289  | 0.58102  | -0.89242 |             |
| Sum of electronic and zero-point Energies=   |          |          |          | -488.116803 |
| Sum of electronic and thermal Energies=      |          |          |          | -488.105907 |
| Sum of electronic and thermal Enthalpies=    |          |          |          | -488.104963 |
| Sum of electronic and thermal Free Energies= |          |          |          | -488.151774 |

- [1] A. G. Massey and A. J. Park, "Perfluorophenyl derivatives of the elements: I. Tris(pentafluorophenyl)boron," *J. Organometal. Chem.*, vol. 2, no. 3, pp. 245-250, 1964.
- [2] S. J. Connelly, W. Kaminsky, and D. M. Heinekey, "Structure and solution reactivity of (Triethylsilyl)triethylsilane cations," *Organometallics*, vol. 32, no. 24, pp. 7478-7481, 2013.
- [3] Gaussian 09, Revision D.01, M. J. Frisch, G. W. Trucks, H. B. Schlegel, G. E. Scuseria, M. A. Robb, J. R. Cheeseman, G. Scalmani, V. Barone, B. Mennucci, G. A. Petersson, H. Nakatsuji, M. Caricato, X. Li, H. P. Hratchian, A. F. Izmaylov, J. Bloino, G. Zheng, J. L. Sonnenberg, M. Hada, M. Ehara, K. Toyota, R. Fukuda, J. Hasegawa, M. Ishida, T. Nakajima, Y. Honda, O. Kitao, H. Nakai, T. Vreven, J. A. Montgomery, Jr., J. E. Peralta, F. Ogliaro, M. Bearpark, J. J. Heyd, E. Brothers, K. N. Kudin, V. N. Staroverov, T. Keith, R. Kobayashi, J. Normand, K. Raghavachari, A. Rendell, J. C. Burant, S. S. Iyengar, J. Tomasi, M. Cossi, N. Rega, J. M. Millam, M. Klene, J. E. Knox, J. B. Cross, V. Bakken, C. Adamo, J. Jaramillo, R. Gomperts, R. E. Stratmann, O. Yazyev, A. J. Austin, R. Cammi, C. Pomelli, J. W. Ochterski, R. L. Martin, K. Morokuma, V. G. Zakrzewski, G. A. Voth, P. Salvador, J. J. Dannenberg, S. Dapprich, A. D. Daniels, O. Farkas, J. B. Foresman, J. V. Ortiz, J. Cioslowski, D. J. Fox, *Gaussian, Inc.*, Wallingford CT, **2013**.
- [4] a) F. Weigend, R. Ahlrichs, *Phys. Chem. Chem. Phys.* **2005**, *7*, 3297-3305; b) J.-D. Chai, M. Head-Gordon, *J. Chem. Phys.* **2008**, *128*, 084106; c) J.-D. Chai, M. Head-Gordon, *Phys. Chem. Chem. Phys.* **2008**, *10*, 6615-6620; d) S. Grimme, *J. Chem. Phys. A* **2005**, *109*, 3067-3077; e) M. M. Quintal, A. Karton, M. A. Iron, A. D. Boese, J. M. L. Martin, *J. Chem. Phys. A* **2006**, *110*, 709-716; f) Li, Q. S.; Zhang, J.; Zhang, S. *Chem. Phys. Lett.* **2005**, *404*, 100-106; g) Grimme, S.; Antony, J.; Ehrlich, S.; Krieg, H. *J. Chem. Phys.* **2010**, *132*, 154104; h) Pantazis, D. A.; Neese, F. *Theor. Chem. Acc.* **2012**, *131*, 1-7.
- [5] P. Schwerdtfeger, M. Dolg, W. H. E. Schwarz, G. A. Bowmaker, P. D. W. Boyd, *J. Chem. Phys.* **1989**, *91*, 1762-1774.
- [6] a) U. Wedig, M. Dolg, H. Stoll, and H. Preuss, in *Quantum Chemistry: The Challenge of Transition Metals and Coordination Chemistry*, ed. A. Veillard **1986**, 79; b) D. Andrae, U. Haeussermann, M. Dolg, H. Stoll, and H. Preuss, *Theor. Chem. Acc.* **1990**, *77*, 123-141.
